# Supplementary material for: Asymmetric transfer hydrogenation of imines in water/methanol co-solvent system and mechanistic investigation by DFT study
Source: Royal Society of Chemistry journal article supplement (doi:10.1039/c4ra07964g), 2014-01-01
Supplement: c4ra07964g1.pdf [file c4ra07964g1.pdf]

## Supporting Information

### Asymmetric Transfer Hydrogenation of Imines in Water/Methanol Co-Solvent System and Mechanistic Investigation by DFT Study

*Vaishali S. Shende*<sup>a</sup>, *Savita K. Shingote*<sup>a</sup>, *Sudhindra H. Deshpande*<sup>a</sup>, *Nishamol Kuriakose*<sup>b</sup>,  
*Kumar Vanka*<sup>b\*</sup>, *Ashutosh A. Kelkar*<sup>a\*</sup>

<sup>a</sup>Chemical Engineering & Process Development, National Chemical Laboratory,

<sup>b</sup>Physical and Materials Chemistry Division, National Chemical Laboratory,

Pune 411008, India

Corresponding Author: E-mail: [aa.kelkar@ncl.res.in](mailto:aa.kelkar@ncl.res.in) , Fax: +91 20 25902621

E-mail: [k.vanka@ncl.res.in](mailto:k.vanka@ncl.res.in) , Fax: +91 20 25902636

### Content

|                                                               |    |
|---------------------------------------------------------------|----|
| 1. General information                                        | 2  |
| 2. General procedure for ATH of imines in water               | 2  |
| 3. C-T (Conversion Vs Time) profile for ATH of <b>1a</b>      | 3  |
| 4. Co-solvent screening of ATH of imine <b>1a</b>             | 3  |
| 5. Analytic data of products                                  | 5  |
| 6. <sup>1</sup> H and <sup>13</sup> C NMR spectra of products | 8  |
| 7. HPLC traces of products                                    | 17 |
| 8. Computational Details                                      | 23 |

## 1. General information

Unless otherwise specified, the chemicals were obtained commercially and used without further purification. Imine derivatives were synthesized by literature procedure.<sup>1</sup> Water was distilled prior to use. NMR spectra were recorded on a Bruker 200 Hz NMR spectrometer with TMS as the internal standard. Gas chromatographic analysis was carried out on a Agilent 6850 GC equipped with a HP1 column and an FID detector (75 psi Helium gas, 75 psi hydrogen gas, and 220 °C injector and 250 °C detector temperature). HPLC analysis was performed on Perkin Elmer Series 200 equipped with Chiralcel OD-H column purchased from Daicel Chemical Industries. The catalyst  $[\text{Cp}^*\text{RhCl}_2]_2$  used was prepared according to the literature<sup>2</sup> and the racemic products were prepared using racemic TsDPEN and  $[\text{Cp}^*\text{RhCl}_2]_2$  as pre-catalyst under the optimized conditions. The configurations of the products were assigned by comparison of their HPLC retention times with those reported (see below) or by analogy.

## 2. General Procedure for asymmetric transfer hydrogenation of imines

Round bottom flask containing a magnetic stirring bar, and  $[\text{Rh}(\text{Cp}^*)\text{Cl}_2]_2$  (1.55 mg, 0.0025 mmol) and (1S, 2S)-TsDPEN (2.75 mg, 0.0075 mmol) in distilled water (1 ml) was stirred for 1 h at 40°C to generate the pre-catalyst. To the above pre-catalyst solution imine substrate (0.5 mmol), HCOONa (0.170 g, 2.5 mmol) and MeOH (1 ml) was added. The reaction mixture was stirred at 40°C for the time indicated, then cooled to room temperature and extracted with DCM (3ml x 2). Organic phase was dried over  $\text{Na}_2\text{SO}_4$  and solvent was removed under reduced pressure. Conversion was determined by GC and enantioselectivity was determined by Chiral HPLC

### 3. C-T (Conversion Vs Time) profile for ATH of 1a

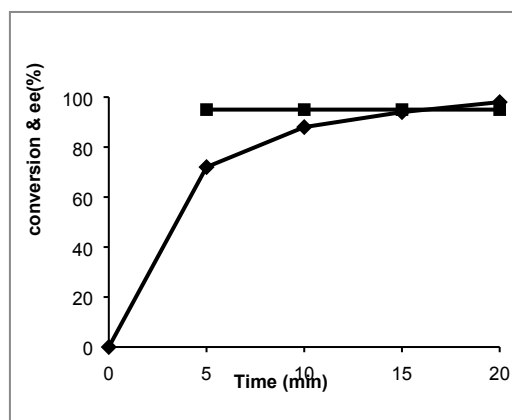

**Reaction conditions:** 1a (0.5 mmol), [Rh(Cp<sup>\*</sup>)Cl<sub>2</sub>]<sub>2</sub> (0.0025 mmol), (1S, 2S)-TsDPEN (0.0075 mmol), HCOONa (2.5 mmol), 40°C, solvent (2 ml), H<sub>2</sub>O/ MeOH ( v/v, 1:1); Conv (\*), ee (O) **Figure S1:** C-T (Conversion Vs Time) profile for ATH of 1a

### 4. Co-solvent screening of ATH of imine 1a

**Table S1:** Co-solvent screening for ATH of imine 1a, conversions at 30 min reaction time

| Entry | Co-solvent        | Conv (%) | ee (%) |
|-------|-------------------|----------|--------|
| 1     | MeOH <sup>a</sup> | 98       | 94     |
| 2     | EtOH <sup>a</sup> | 98       | 94     |
| 3     | n-PrOH            | 93       | 91     |
| 4     | n-BuOH            | 94       | 92     |
| 5     | IPA               | 94       | 92     |
| 6     | Ethylene glycol   | 95       | 80     |
| 7     | DMF               | 88       | 93     |
| 8     | DMSO              | 95       | 89     |
| 9     | NMP               | 95       | 84     |
| 10    | 1,4-dioxane       | 95       | 83     |
| 11    | THF               | 25       | 92     |

**Reaction conditions:** 1a (0.5 mmol), [Rh(Cp<sup>\*</sup>)Cl<sub>2</sub>]<sub>2</sub> (0.0025 mmol), (1S, 2S)-TsDPEN (0.0075 mmol), HCOONa (2.5 mmol), 40°C, solvent (2 ml), H<sub>2</sub>O/ co-solvent ( v/v, 1:1), Time:30min, <sup>a</sup> Time: 20min

**Table S2:** Co-solvent screening for ATH of imine **1a**, conversions at 20 min reaction time

| Entry     | Co-solvents     | Conv (%) |
|-----------|-----------------|----------|
| <b>1</b>  | MeOH            | 98       |
| <b>2</b>  | EtOH            | 98       |
| <b>3</b>  | n-PrOH          | 70       |
| <b>4</b>  | n-BuOH          | 71       |
| <b>5</b>  | IPA             | 89       |
| <b>6</b>  | Ethylene glycol | 80       |
| <b>7</b>  | DMF             | 77       |
| <b>8</b>  | DMSO            | 89       |
| <b>9</b>  | NMP             | 76       |
| <b>10</b> | 1,4-dioxane     | 72       |
| <b>11</b> | THF             | 16       |

**Reaction conditions:** 1a (0.5 mmol), [Rh(Cp\*)Cl<sub>2</sub>]<sub>2</sub> (0.0025 mmol), (1S, 2S)-TsDPEN (0.0075 mmol), HCOONa (2.5 mmol), 40°C, solvent (2 ml), H<sub>2</sub>O/ co-solvent (v/v, 1:1), Time: 20min

## 5. Analytic data of products

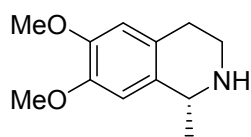

**2a**

**(R)-6,7-Dimethoxy-1-methyl-1,2,3,4-tetrahydroisoquinoline<sup>3</sup>** : 97% yield, 95% ee. <sup>1</sup>H NMR (CDCl<sub>3</sub>, 200 MHz) δ (ppm): 1.44 (d, *J* = 6.7 Hz, 3H), 2.19 (br, 1H), 2.10(m, 2H), 2.90-3.03 (m, 1H), 3.17-3.28 (m, 1H), 3.83 (s, 6H), 3.97-4.07 (q, *J* = 6.7 Hz, 1 H), 6.55 (s, 1H), 6.60 (s, 1H); <sup>13</sup>C NMR (CDCl<sub>3</sub>, 200 MHz) δ (ppm): 22.70, 29.36, 41.67, 51.14, 55.79, 55.93, 109.05, 111.75, 126.67, 132.22, 147.22, 147.31, HPLC (Chiralcel OD-H, hexane:isopropanol: diethylamine = 90:10:0.1, flow rate 1 mL/min, 254 nm): t<sub>S</sub> = 11.76min (minor), t<sub>R</sub> = 14.86 min (major).

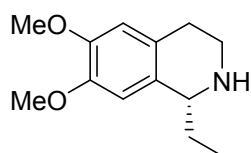

**2b**

**(R)-6,7-Dimethoxy-1-ethyl-1,2,3,4-tetrahydroisoquinoline<sup>3</sup>** : 95 % yield, 94% ee ; <sup>1</sup>H NMR (CDCl<sub>3</sub>, 200 MHz) δ (ppm): 1.01-1.03 (t, *J* = 7.3 Hz, 3H), 1.66-1.77 (m, 1H), 1.86-1.97(m, 1H), 2.0 (br, 1H ), 2.63-2.70 (dt, 5.0 Hz, 16.0 Hz, 1H), 2.72-2.79 (dt, *J* = 5.0 Hz, 16.0 Hz, 1H), 2.93-3.0 (m, 1H), 3.20-3.26 (m, 1H), 3.85 (s, 6H), 3.92 (d, *J* = 2.75 Hz, 1 H), 6.57 (s, 1H), 6.62 (s, 1H); <sup>13</sup>C NMR (CDCl<sub>3</sub>, 200 MHz) δ (ppm): 10.17, 28.66, 29.07, 40.76, 55.45, 55.61, 56.35, 108.83, 111.33, 126.81, 130.79, 146.79, 146.87 HPLC (Chiralcel OD-H, hexane:isopropanol: diethylamine = 80:20:0.1, flow rate 1mL/min, 280 nm): t<sub>S</sub> = 9.91 min (minor), t<sub>R</sub> = 12.50 min (major).

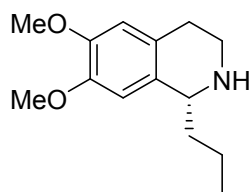

**2c**

**(R)-6,7-Dimethoxy-1-propyl-1,2,3,4-tetrahydroisoquinoline**: 94 % yield , 96% ee. <sup>1</sup>H NMR (CDCl<sub>3</sub>, 200 MHz) δ (ppm): 0.90-0.93 (t, *J* = 7.3 Hz, 3H), 1.33-1.49 (m, 2H), 1.56-1.66(m, 1H), 1.68-1.76(m, 1H), 1.63 (br, 1H ), 2.56-2.63 (dt, 5.5 Hz, 16.0 Hz, 1H), 2.65-2.72 (m, 1H), 2.87-2.92 (dt, 5.0Hz, 12.3 Hz,1H), 3.12-3.18 (m, 1H), 3.78 (s, 3H), 3.79(s, 3H), 3.82-3.85 (dd, *J* = 3.2Hz, 5.0 Hz, 1 H), 6.49 (s, 1H), 6.54 (s, 1H); <sup>13</sup>C NMR (CDCl<sub>3</sub>, 200 MHz) δ (ppm): 14.21, 19.38, 29.31, 38.69, 40.98, 55.18, 55.80, 55.98, 109.17, 111.68,

126.95, 131.30, 147.14, 147.21, HPLC (Chiralcel OD-H, hexane:isopropanol: diethylamine = 90:10:0.1, flow rate 1 mL/min, 280 nm): tS = 10.16 min (minor), tR = 12.66 min (major).

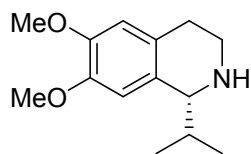

**2d**

**(R)-6,7-Dimethoxy-1-isopropyl -1,2,3,4-tetrahydroisoquinoline**<sup>4</sup>: 94 % yield , 99% ee; <sup>1</sup>H NMR (CDCl<sub>3</sub>, 200 MHz) δ (ppm): 0.73-0.77 (d, *J* = 6.8 Hz, 3H), 1.11-1.15 (d, *J* = 6.8 Hz, 3H), 1.85 (br, 1H), 2.23-2.38 (m, 1H), 2.52-2.67 (m, 1H), 2.74-2.82 (m, 1H), 2.72-2.97 (m, 2H), 3.26-3.35 (m, 1H), 3.85(s, 7H, Overlapped with CH), 6.57 (s, 1H), 6.65 (s, 1H); <sup>13</sup>C NMR (CDCl<sub>3</sub>, 200 MHz) δ (ppm): 16.0, 20.6, 30.3, 32.8, 43.1, 56.2, 56.4, 61.0, 109.4, 112.1, 128.8, 131.0, 147.4, 147.6, HPLC (Chiralcel OD-H, hexane:isopropanol: diethylamine = 90:10:0.1, flow rate 0.5 mL/min, 280 nm): tS = 15.41 min (minor), tR = 17.47 min (major).

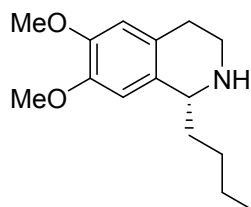

**2e**

**(R)-6,7-Dimethoxy-1-butyl -1,2,3,4-tetrahydroisoquinoline**: 94% yield, 93% ee; <sup>1</sup>H NMR (CDCl<sub>3</sub>, 200 MHz) δ (ppm): 0.88-0.95, t, 7.07 Hz, 3H; 1.29-1.49, m, 2H; 1.69-1.84, m, 2H; 2.63-2.83, m, 2H; 2.92-3.04, m, 2H; 3.18-3.30, dt, 1H; 5.30Hz, 10.99Hz, 1H; 3.82-3.83, s, 6H; 3.88-3.96, m, 1H; 6.55, s, 1H; 6.59, s, 1H; <sup>13</sup>C NMR (CDCl<sub>3</sub>, 200 MHz) δ (ppm): 14.01, 22.80, 28.23, 28.91, 35.94, 40.85, 55.35, 55.80, 55.99, 109.29, 111.74, 126.74, 130.66, 147.27, 147.40 HPLC (Chiralcel OD-H, hexane:isopropanol: diethylamine = 90:10:0.1, flow rate 1 mL/min, 280 nm): tS = 9.06 min (minor), tR = 11.51 min (major).

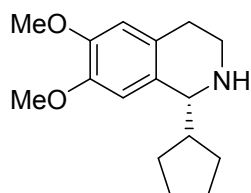

**2f**

**(R)-6,7-Dimethoxy-1-cyclopentyl-1,2,3,4-tetrahydroisoquinoline**: 95 % yield , 97% ee; <sup>1</sup>H NMR (CDCl<sub>3</sub>, 200 MHz) δ (ppm): 1.23-1.76, m, 9H; 2.26-2.43, m, 1H; 2.71-2.78, m, 1H; 2.94-3.06, m, 1H; 3.24-3.35, m, 1H, 3.82, s, 6H; 3.88-3.91, d, 6.90Hz, 1H; 6.54, s, 1H; 6.65, s, 1H; <sup>13</sup>C NMR (CDCl<sub>3</sub>, 200 MHz) δ (ppm): 24.94, 25.70, 28.30, 30.37, 40.46, 45.04, 55.75, 55.98, 58.61, 109.99, 115.55, 126.64, 129.68, 146.92, 147.48; HPLC (Chiralcel OD-H,

hexane:isopropanol: diethylamine = 90:10:0.1, flow rate 1 mL/min, 280 nm): tS = 11.67 min (minor), tR = 14.41 min (major).

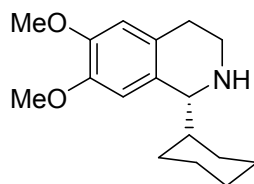

**2g**

**(R)-6,7-Dimethoxy-1-cyclohexyl-1,2,3,4-tetrahydroisoquinoline:** 94 % yield , 99% ee; <sup>1</sup>H NMR (CDCl<sub>3</sub>, 200 MHz) δ (ppm): 1.17-1.41 (m, 6H), 1.71-1.87 (m, 5H), 2.59-2.73 (dt, *J* = 3.7.0 Hz, 15.4 Hz, 1H), 2.87-2.99 (m, 2H), 3.36-3.44 (m, 1H), 3.86-3.92 (s, 7H, overlapped with NCH), 3.98-3.99 (d, 3.79Hz, 1H), 6.58 (s, 1H), 6.63 (s, 1H); <sup>13</sup>C NMR (CDCl<sub>3</sub>, 200 MHz) δ (ppm): 25.75, 26.51, 26.65, 27.01, 29.47, 30.84, 42.29, 43.21, 55.80, 56.09, 60.31, 109.37, 111.70, 128.15, 129.71, 147.03, 147.17, HPLC (Chiralcel OD-H, hexane:isopropanol: diethylamine = 90:10:0.1, flow rate 1 mL/min, 274 nm): tS = 8.74 min (minor), tR = 9.60 min (major).

#### References:

1. Craig P. N.; Nabenhauer F. P.; Williams P. M.; Macko E.; Toner J., *J. Am. Chem. Soc.*, 1952, **74**, 1316-1317.
2. Koelle, U.; Kossakowski, J.; Grumbine, D.; Tilley, T. D., *Inorganic Syntheses*, John Wiley & Sons, Inc.: 2007; pp 225-228
3. Li, C.; Xiao, J., *J. Am. Chem. Soc.* 2008, **130** , 13208-13209
4. Polniaszek, R. P.; Kaufman, C. R., *J. Am. Chem. Soc.* 1989, **111**, 4859-4863

## 6. $^1\text{H}$ and $^{13}\text{C}$ NMR spectra of products

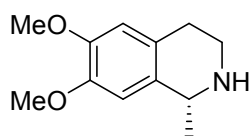

2a

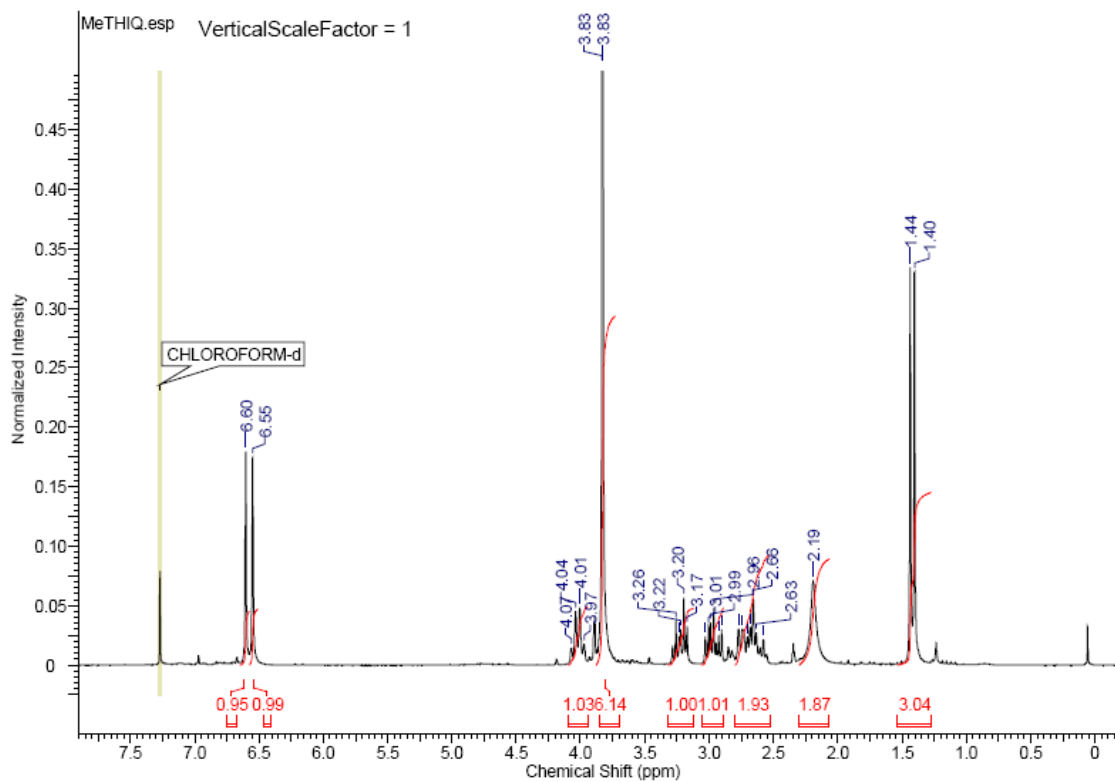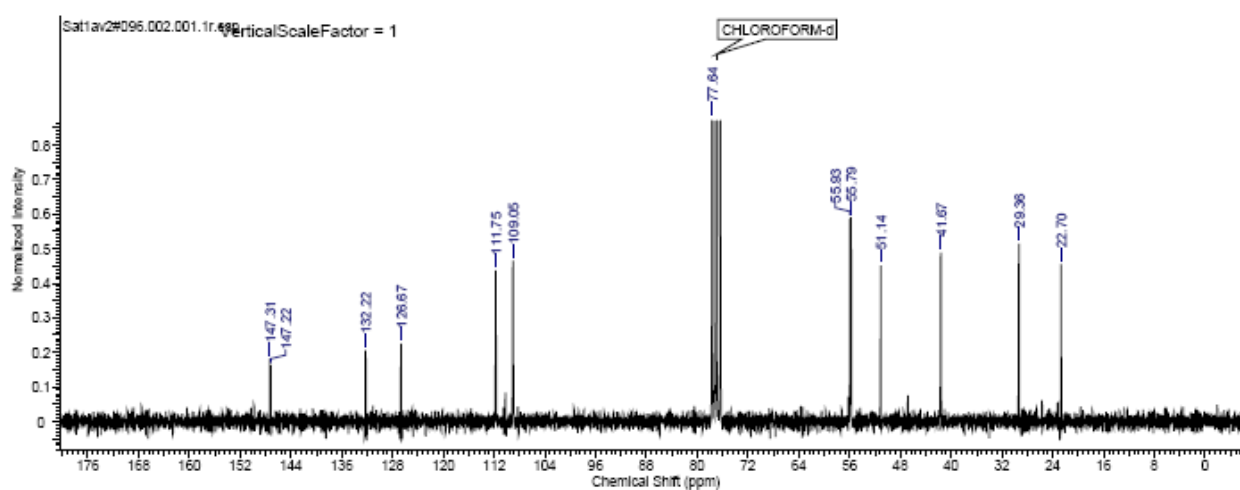



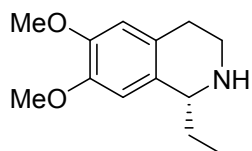

2b

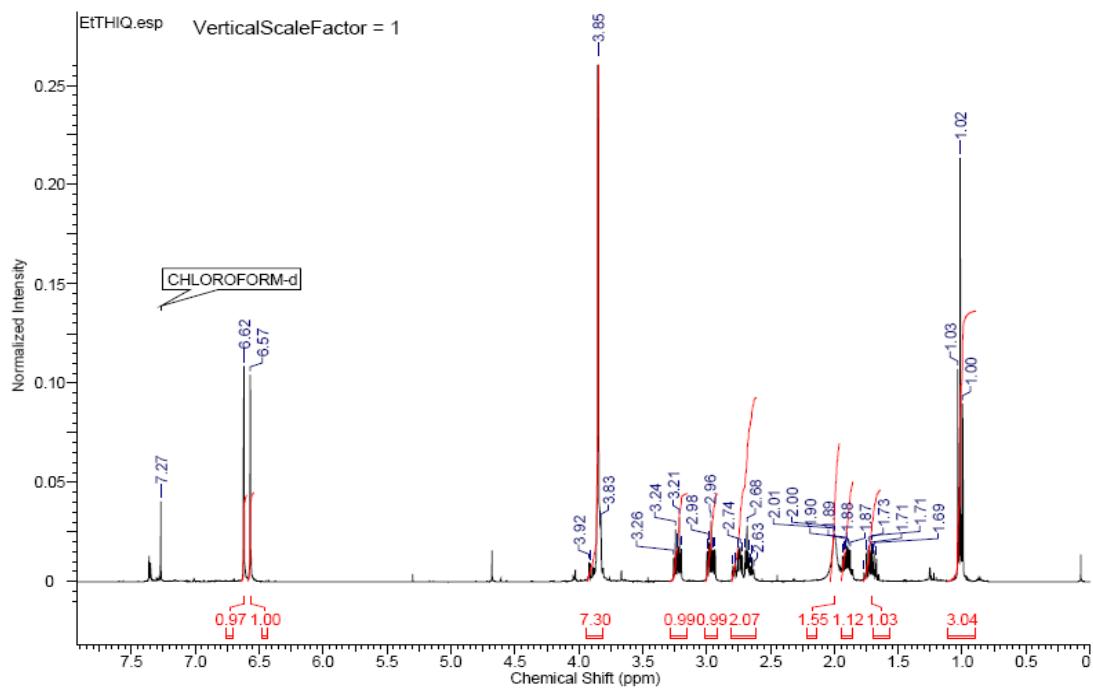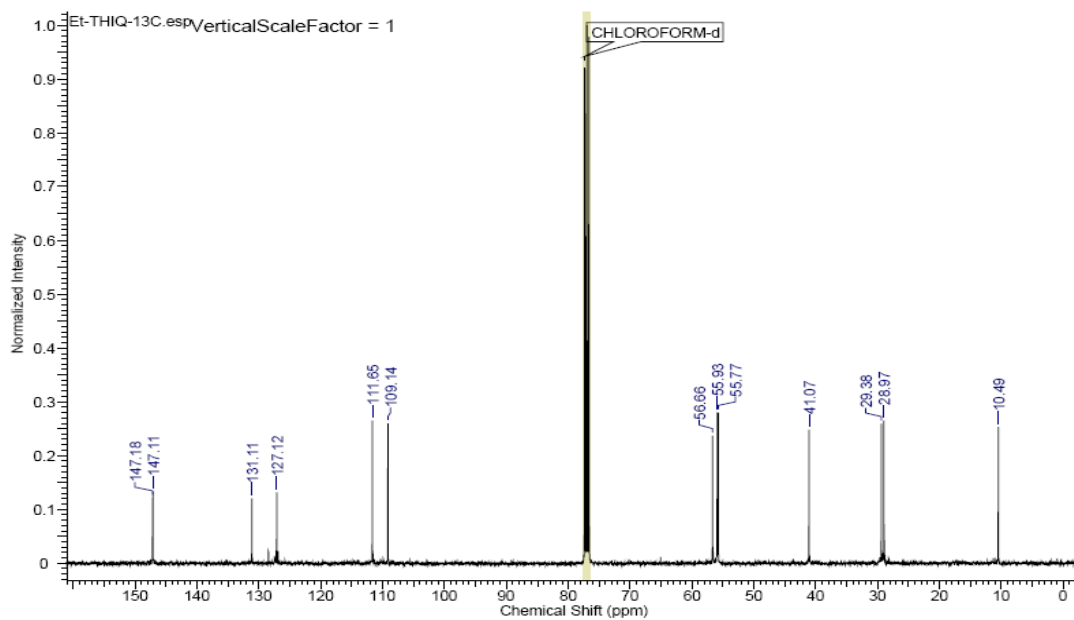

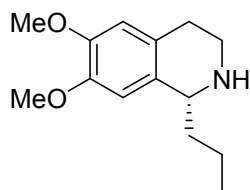

2c

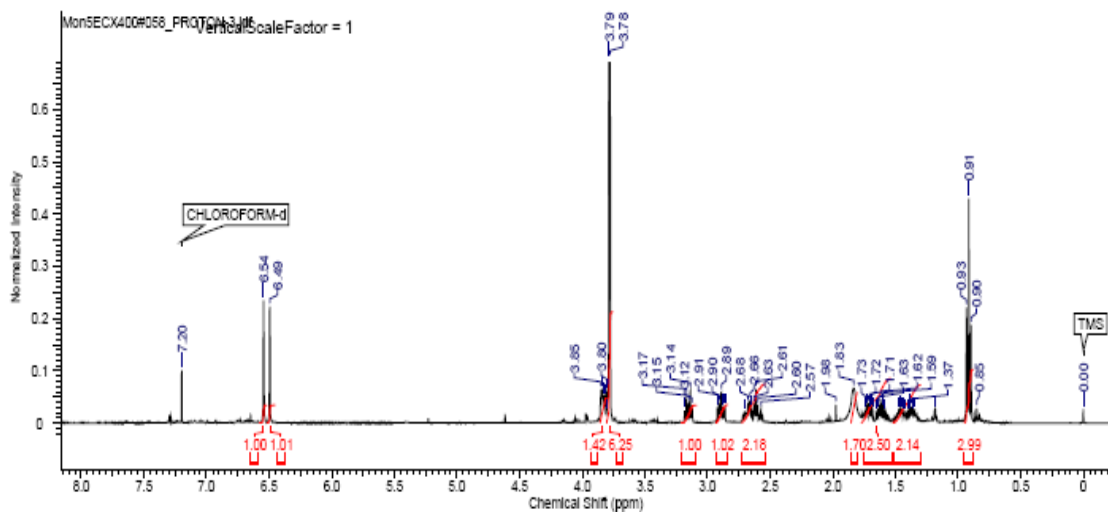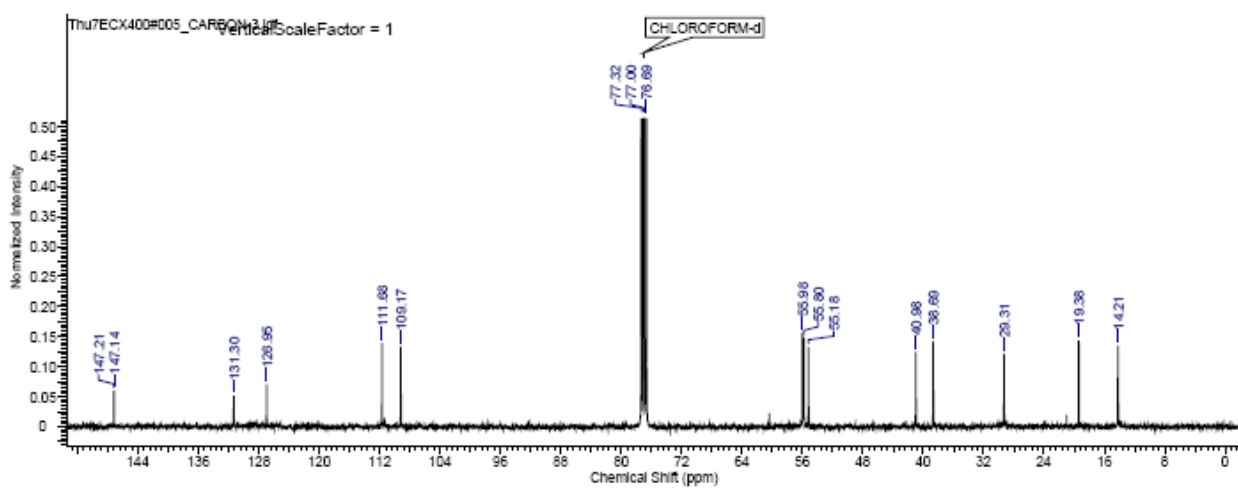

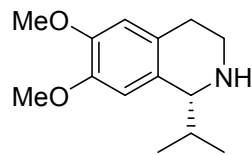

2d

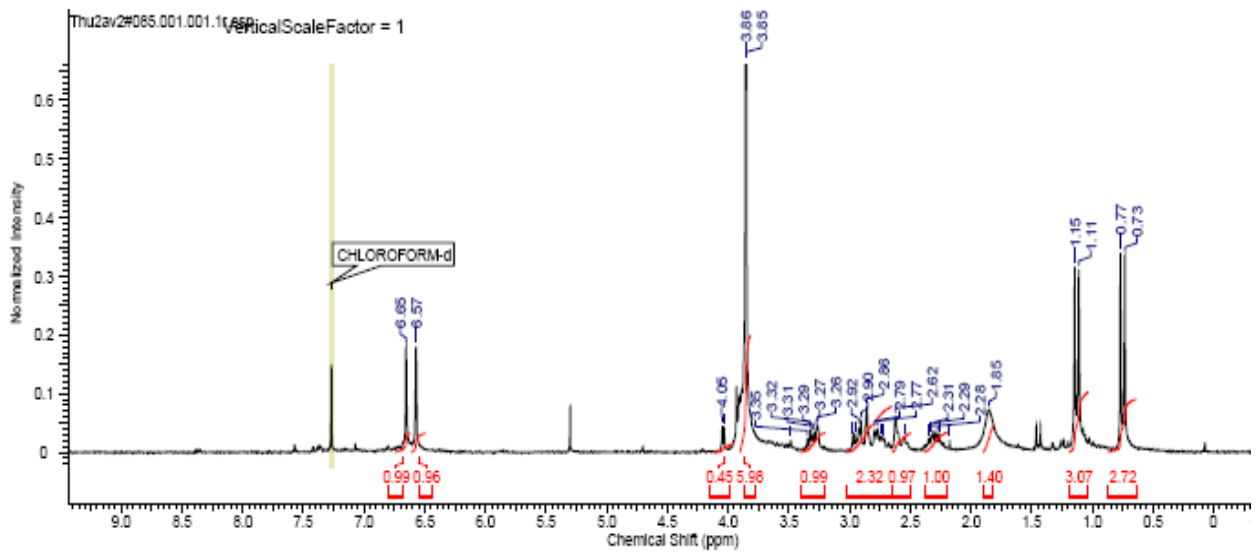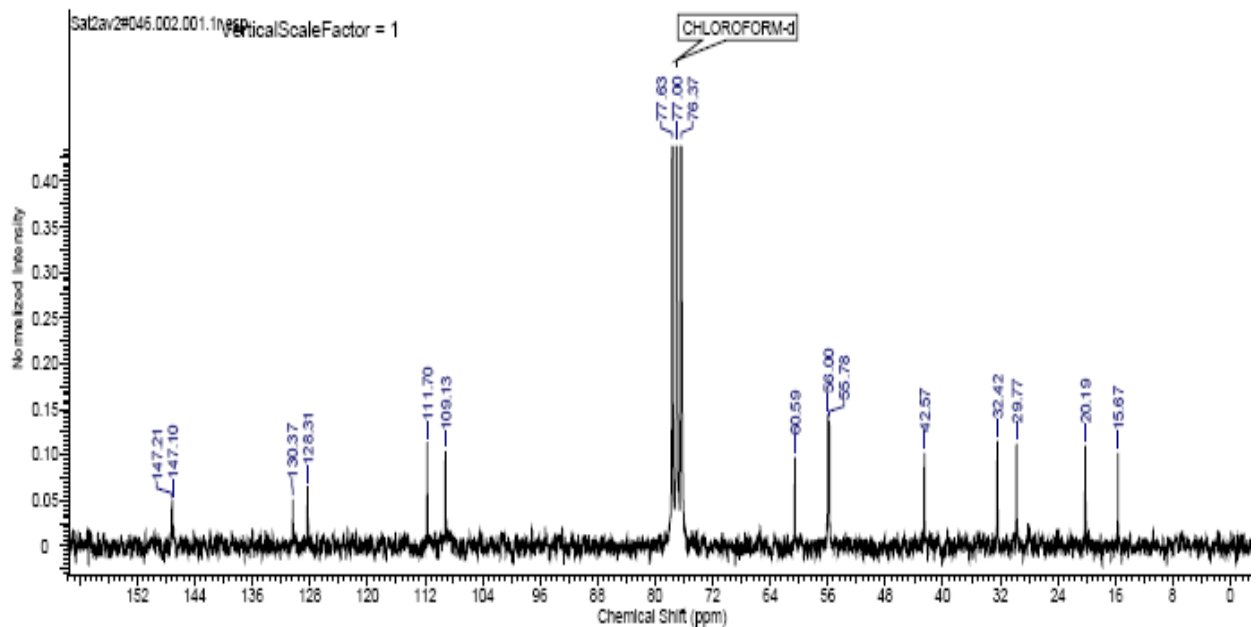

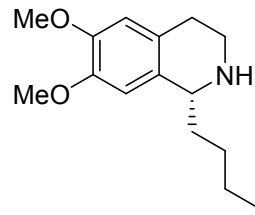

2e

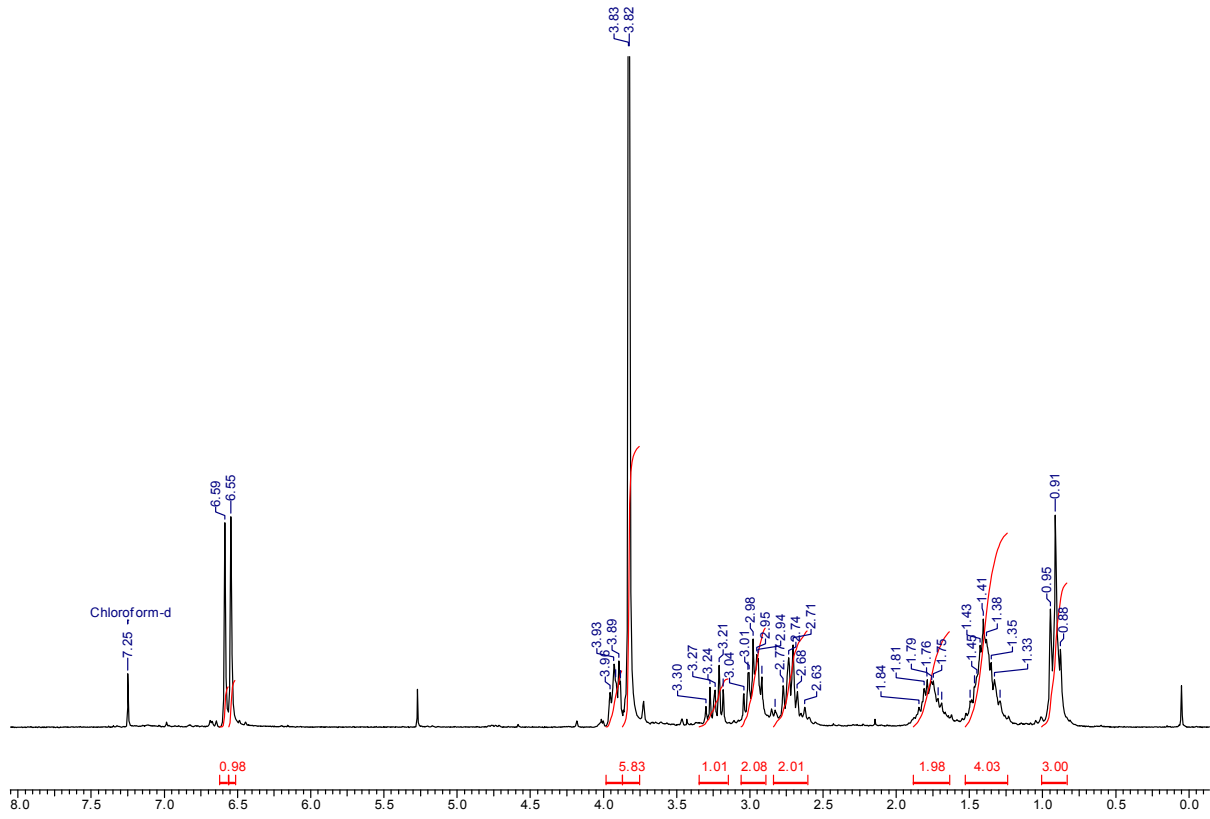

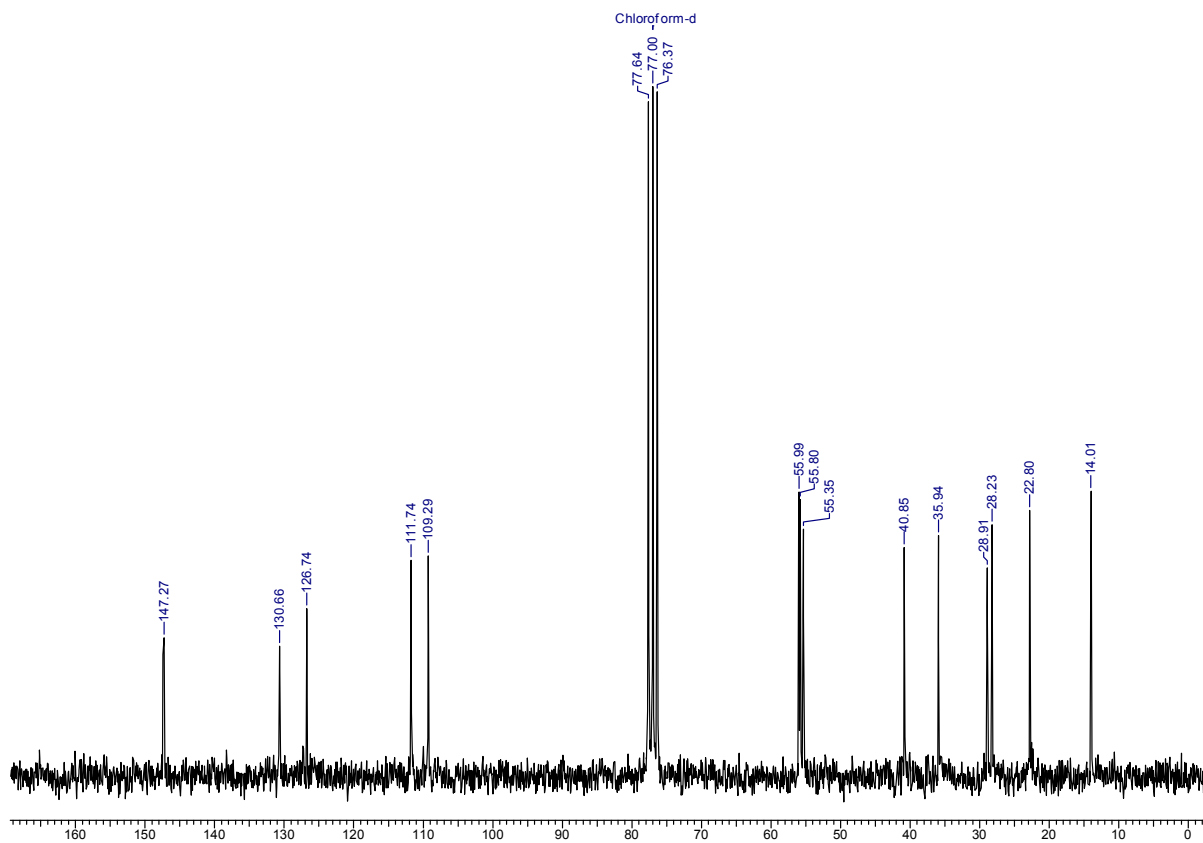

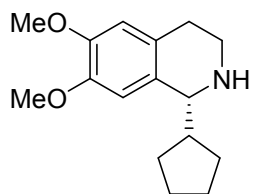

2f

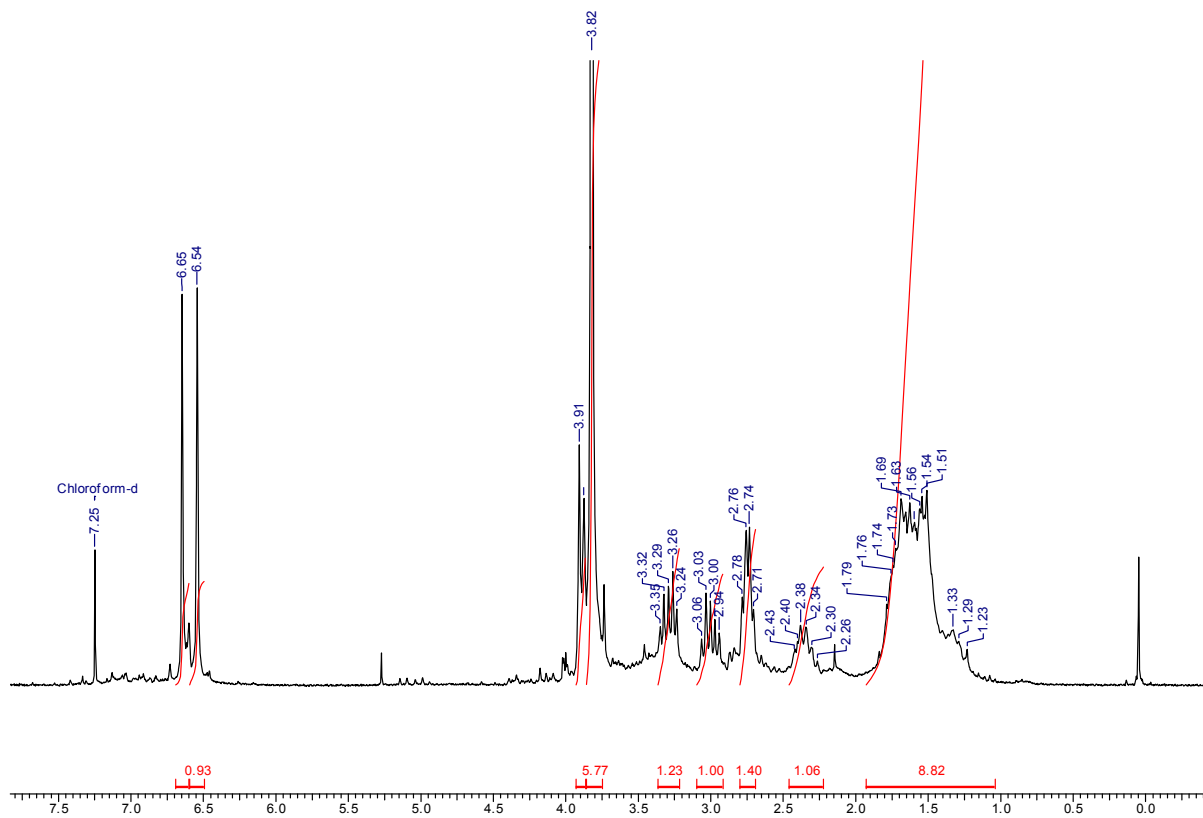

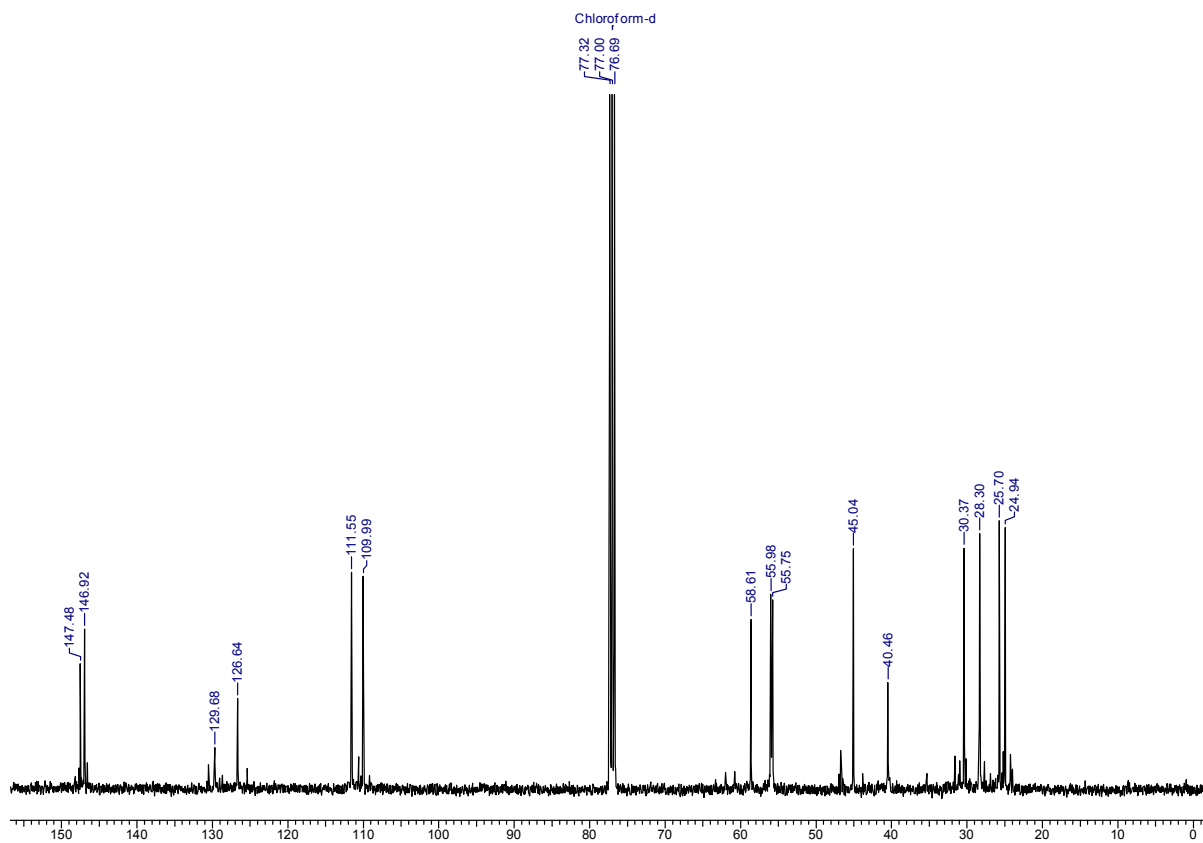

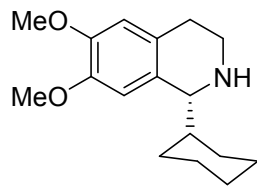

2g

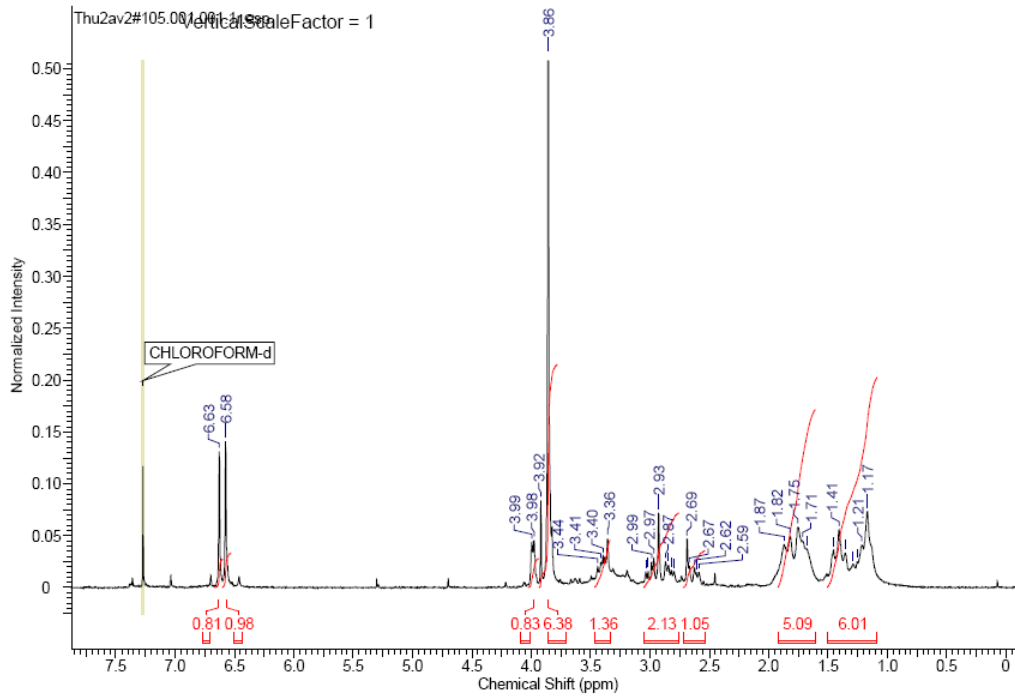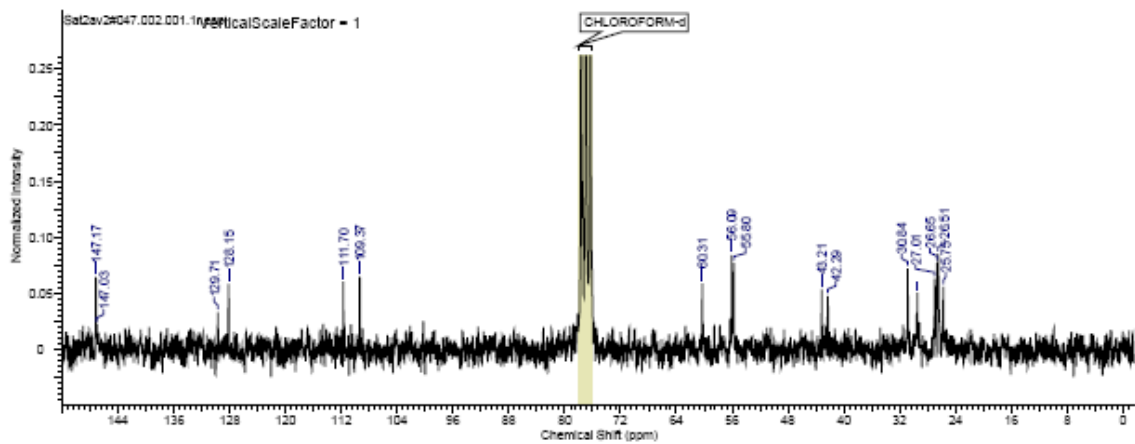



## 7. HPLC traces of products

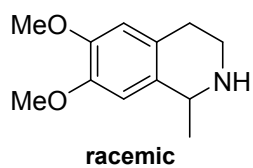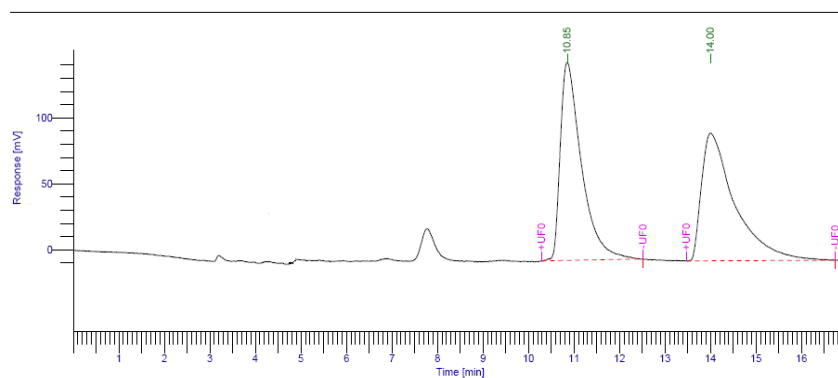

| Peak # | Time [min] | Area [uV*sec] | Area [%] |
|--------|------------|---------------|----------|
| 1      | 10.85      | 4854960.03    | 49.71    |
| 2      | 14.00      | 4911421.26    | 50.29    |
|        |            | 9766381.29    | 100.00   |

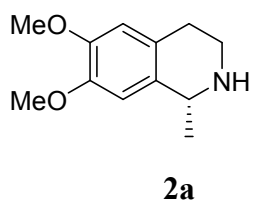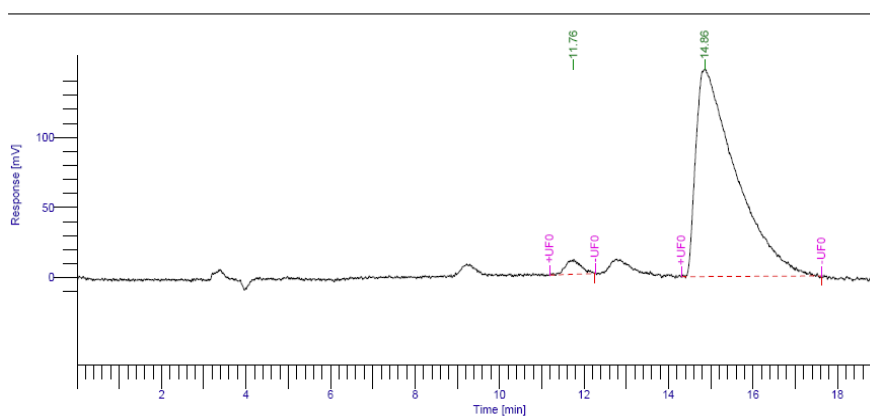

| Peak # | Time [min] | Area [uV*sec] | Area [%] |
|--------|------------|---------------|----------|
| 1      | 11.76      | 267523.73     | 2.67     |
| 2      | 14.86      | 9759060.14    | 97.33    |
|        |            | 10026583.88   | 100.00   |

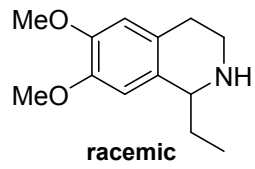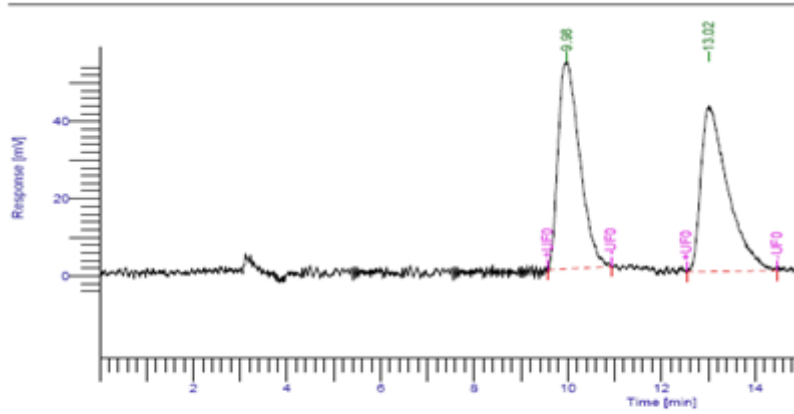

| Peak # | Time [min] | Area [uV*sec] | Area [%] |
|--------|------------|---------------|----------|
| 1      | 9.98       | 1717274.99    | 50.04    |
| 2      | 13.02      | 1714331.09    | 49.96    |
|        |            | 3431606.09    | 100.00   |

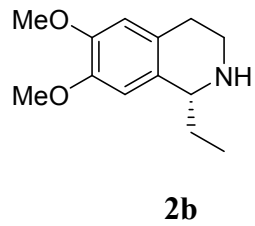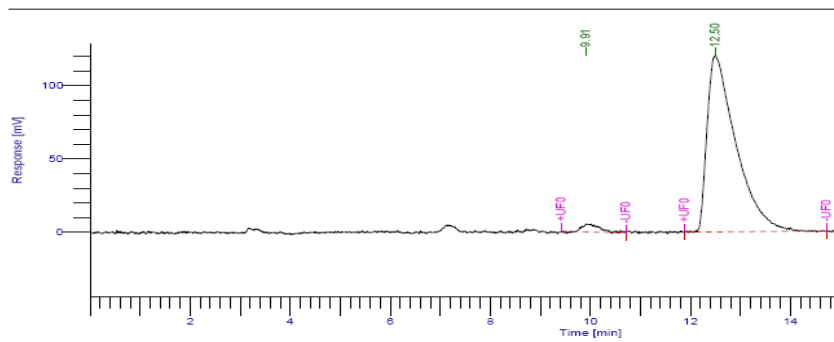

| Peak # | Time [min] | Area [uV*sec] | Area [%] |
|--------|------------|---------------|----------|
| 1      | 9.91       | 138603.00     | 2.80     |
| 2      | 12.50      | 4802688.78    | 97.20    |
|        |            | 4941291.78    | 100.00   |

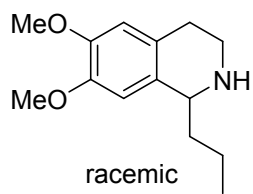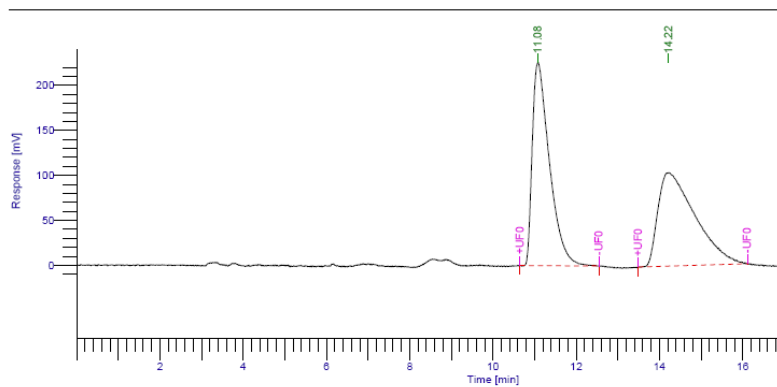

| Peak # | Time [min] | Area [uV*sec] | Area [%] |
|--------|------------|---------------|----------|
| 1      | 11.08      | 6483172.87    | 50.33    |
| 2      | 14.22      | 6398583.28    | 49.67    |
|        |            | 12881756.15   | 100.00   |

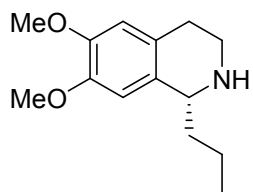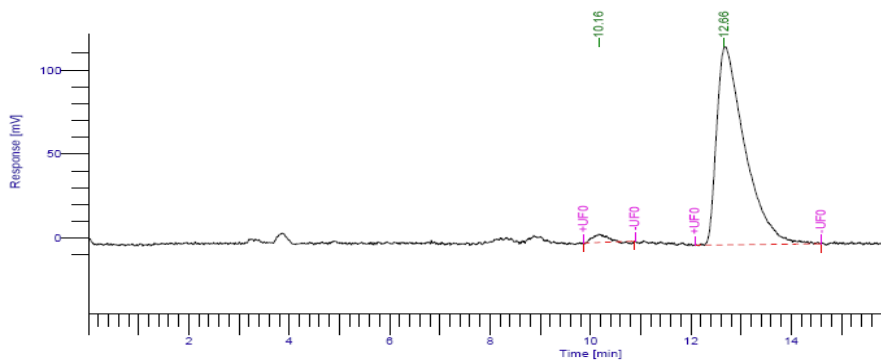

| Peak # | Time [min] | Area [uV*sec] | Area [%] |
|--------|------------|---------------|----------|
| 1      | 10.16      | 99738.32      | 2.13     |
| 2      | 12.66      | 4575720.36    | 97.87    |
|        |            | 4675458.68    | 100.00   |

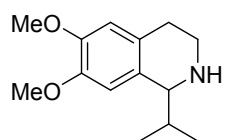

racemic

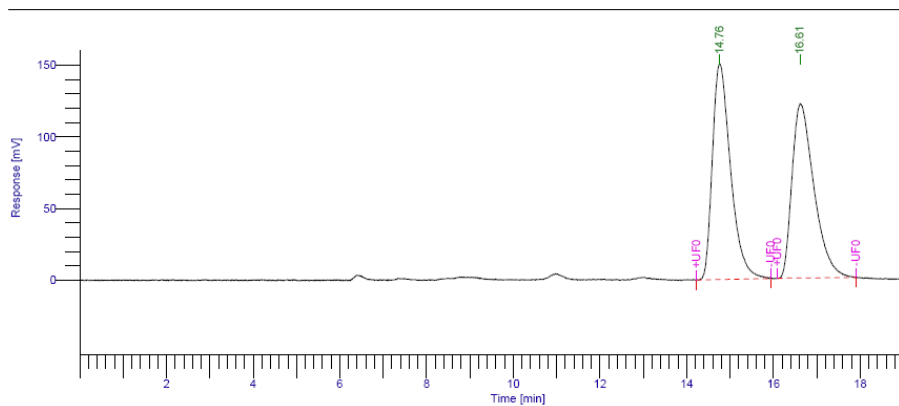

| Peak # | Time [min] | Area [uV*sec] | Area [%] |
|--------|------------|---------------|----------|
| 1      | 14.76      | 4374205.56    | 50.62    |
| 2      | 16.61      | 4267132.56    | 49.38    |
|        |            | 8641338.11    | 100.00   |

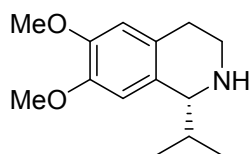

2d

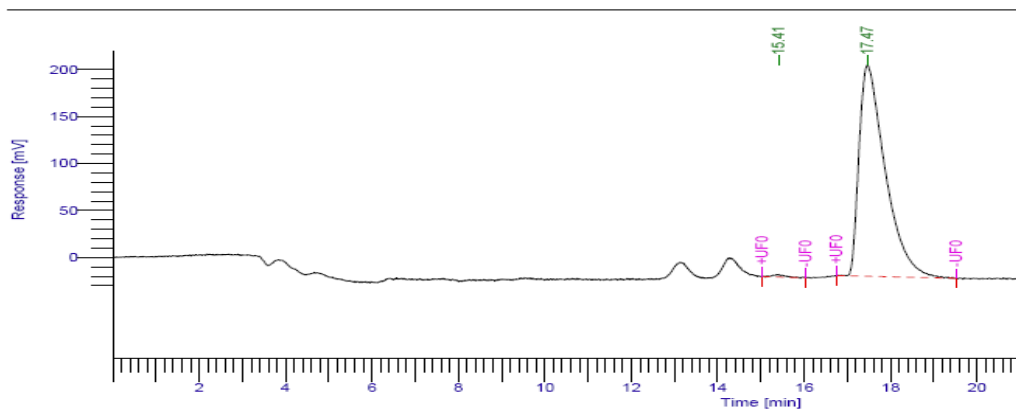

| Peak # | Time [min] | Area [uV*sec] | Area [%] |
|--------|------------|---------------|----------|
| 1      | 15.41      | 57075.21      | 0.60     |
| 2      | 17.47      | 9457054.30    | 99.40    |
|        |            | 9514129.52    | 100.00   |

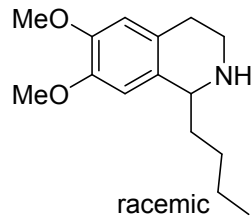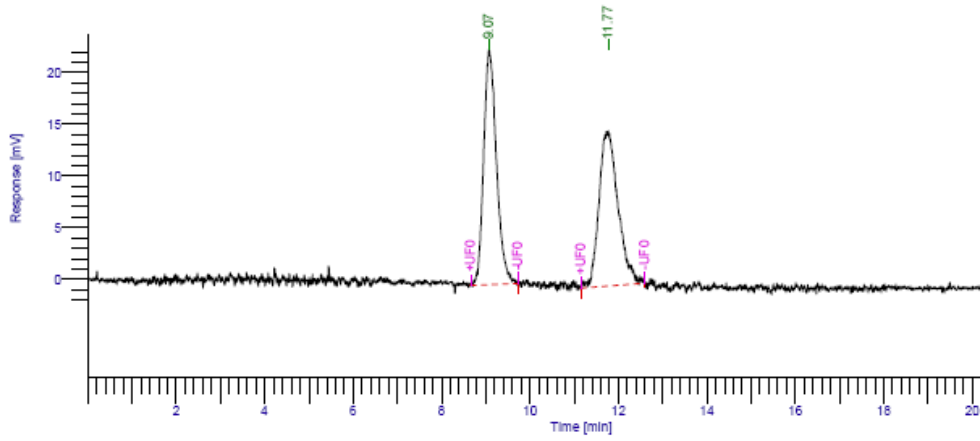

| Peak # | Time [min] | Area [uV*sec] | Area [%] |
|--------|------------|---------------|----------|
| 1      | 9.07       | 456100.80     | 50.44    |
| 2      | 11.77      | 448096.44     | 49.56    |
|        |            | 904197.04     | 100.00   |

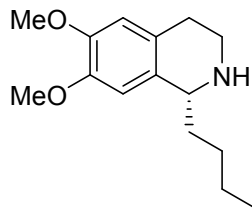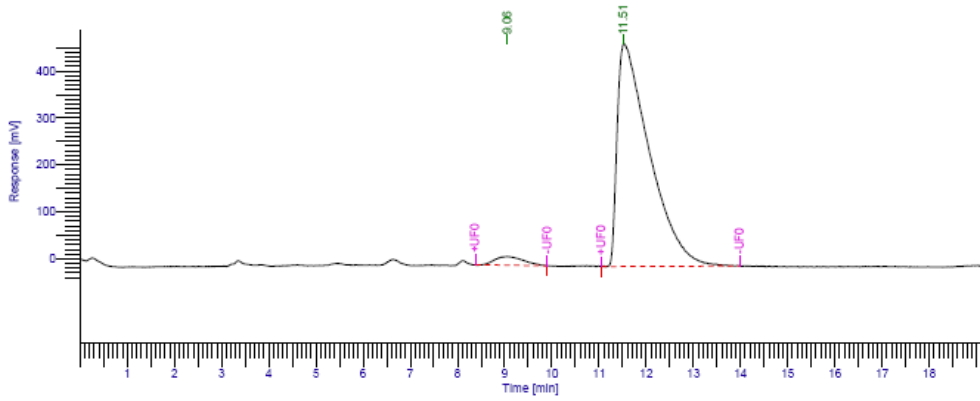

| Peak # | Time [min] | Area [uV*sec] | Area [%] |
|--------|------------|---------------|----------|
| 1      | 9.06       | 775940.76     | 3.33     |
| 2      | 11.51      | 22568180.87   | 96.67    |
|        |            | 23334101.63   | 100.00   |

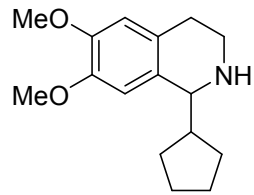

racemic

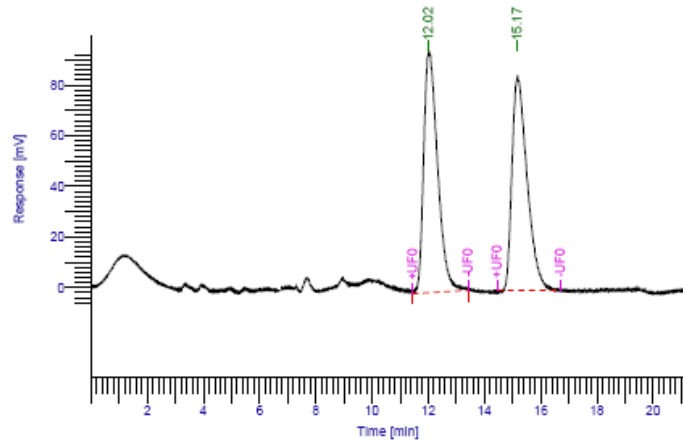

| Peak # | Time [min] | Area [uV*sec] | Area [%] |
|--------|------------|---------------|----------|
| 1      | 12.02      | 3286224.92    | 51.01    |
| 2      | 15.17      | 3156888.41    | 48.99    |
|        |            | 6442913.33    | 100.00   |

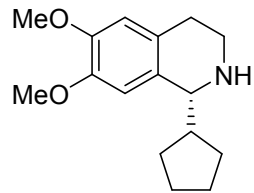

2f

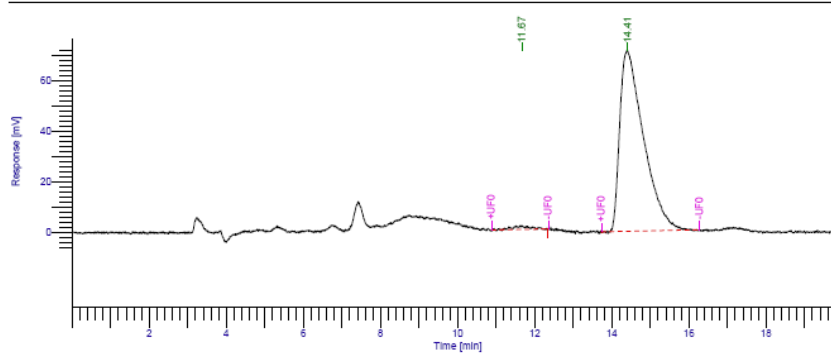

| Peak # | Time [min] | Area [uV*sec] | Area [%] |
|--------|------------|---------------|----------|
| 1      | 11.87      | 45547.86      | 1.47     |
| 2      | 14.41      | 3053557.62    | 98.53    |
|        |            | 3099105.48    | 100.00   |

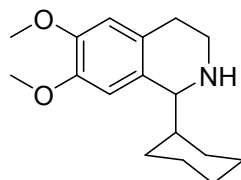

racemic

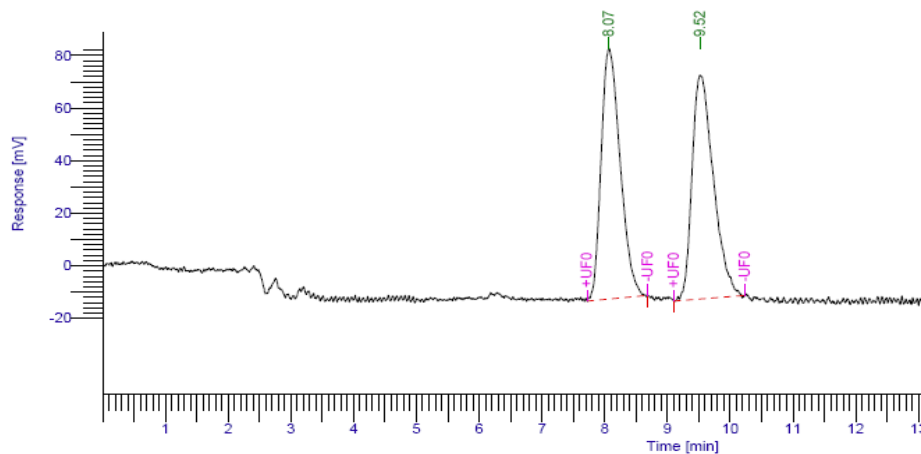

| Peak # | Time [min] | Area [uV*sec] | Area [%] |
|--------|------------|---------------|----------|
| 1      | 8.07       | 2004681.47    | 49.90    |
| 2      | 9.52       | 2012926.76    | 50.10    |
|        |            | 4017608.23    | 100.00   |

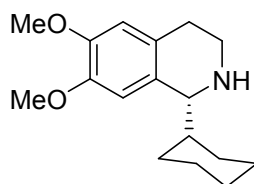

2g

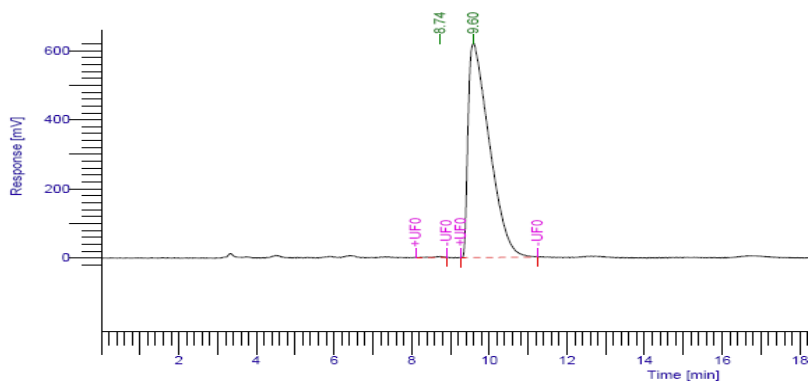

| Peak # | Time [min] | Area [uV*sec] | Area [%] |
|--------|------------|---------------|----------|
| 1      | 8.74       | 61367.00      | 0.26     |
| 2      | 9.60       | 23516979.83   | 99.74    |
|        |            | 23578346.82   | 100.00   |

## 8. Computational Details

All the calculations have been done with Turbomole 6.4,<sup>1</sup> using the TZVP basis set<sup>2</sup> and the PBE functional.<sup>3</sup> Furthermore, in order to obtain more reliable energies, single point calculations have been done with the B3LYP<sup>4</sup> functional. Dispersion corrections<sup>5</sup> have also been included with single point calculations. For the dispersion correction calculation, a modified empirical dispersion correction, DFT-D3 proposed by Grimme<sup>5,6</sup> has been employed. The resolution of identity (RI)<sup>7</sup>, along with the multipole accelerated resolution of identity (marij)<sup>8</sup> approximations have been employed for an accurate and efficient treatment of the electronic Coulomb term in the DFT calculations. The values reported are  $\Delta G$  values, with zero point energy, internal energy and entropic contributions included through frequency calculations on the optimized minima and transition state structures, with the temperature taken to be 298.15 K. All the obtained transition states were confirmed to have only a single negative frequency corresponding to the correct normal mode. In addition, intrinsic reaction coordinate (IRC)<sup>9</sup> calculations were done with all the transition states in order to further confirm that they were the correct transition states, yielding the correct reactant and product structures.

Calculation of relative rate of reaction employing equation  $\Delta G = -RT \ln K$

$$K = RT \ln K$$

$$\frac{K_1}{K_2} = e^{-(\Delta G_1 - \Delta G_2)/RT}$$

$$\frac{K_{TS C}}{K_{TS A}} = e^{-(7.1)/RT} \quad K_{TS A} = 1294 K_{TS C}$$

$$\frac{K_{TS C}}{K_{TS B}} = e^{-(4.3)/RT} \quad K_{TS B} = 137600 K_{TS C}$$



## DFT Calculations

**Table S3.** The relative free energy at different temperatures; values are given in (au) and in kcal/mol.

| System                                                                                                                           | Relative Free Energy<br>(T=298.15) |          | Relative Free Energy (T=313.15) |          |
|----------------------------------------------------------------------------------------------------------------------------------|------------------------------------|----------|---------------------------------|----------|
|                                                                                                                                  | au                                 | kcal/mol | au                              | kcal/mol |
| <b>Pathway (i) with H<sub>2</sub>O</b>                                                                                           |                                    |          |                                 |          |
| 3a + 1a                                                                                                                          | 0.000                              | 0.000    | 0.000                           | 0.000    |
| Reactant complex                                                                                                                 | -0.053                             | -32.952  | -0.052                          | -32.116  |
| TS B                                                                                                                             | -0.01                              | -6.362   | -0.010                          | -5.381   |
| Product complex                                                                                                                  | -0.04                              | -24.996  | -0.040                          | -24.221  |
| 3a product + 2a + H <sub>2</sub> O                                                                                               | -0.032                             | -20.017  | -0.032                          | -20.143  |
| <b>Pathway (ii) with CH<sub>3</sub>OH</b>                                                                                        |                                    |          |                                 |          |
| 3a + 1a                                                                                                                          | 0.000                              | 0.000    | 0.000                           | 0.000    |
| Reactant complex                                                                                                                 | -0.059                             | -37.196  | -0.059                          | -36.357  |
| TS C                                                                                                                             | -0.013                             | -8.077   | -0.013                          | -7.113   |
| Product complex                                                                                                                  | -0.043                             | -26.799  | -0.043                          | -26.027  |
| 3a product + 2a + CH <sub>3</sub> OH                                                                                             | -0.032                             | -20.017  | -0.032                          | -20.143  |
| <b>Pathway (iii) without solvent</b>                                                                                             |                                    |          |                                 |          |
| 3a + 1a                                                                                                                          | 0.000                              | 0.000    | 0.000                           | 0.000    |
| Reactant complex                                                                                                                 | -0.048                             | -30.088  | -0.048                          | -29.830  |
| TS A                                                                                                                             | -0.009                             | -5.5919  | -0.009                          | -5.102   |
| Product complex                                                                                                                  | -0.029                             | -18.188  | -0.029                          | -17.791  |
| 3a product + 2a                                                                                                                  | -0.032                             | -20.017  | -0.032                          | -20.143  |
| <b>Hydrogen Bonding Energy Differences</b>                                                                                       |                                    |          |                                 |          |
| TS B                                                                                                                             | 0.000                              | 0.000    | 0.000                           | 0.000    |
| TS B 8M                                                                                                                          | 0.011                              | 6.822    | 0.011                           | 6.990    |
| TS C                                                                                                                             | 0.000                              | 0.000    | 0.000                           | 0.000    |
| TS C 8M                                                                                                                          | 0.010                              | 6.506    | 0.010                           | 6.707    |
| (A) N-H of product <b>2a</b> hydrogen bonding only with methanol (Fig. 4)                                                        | 0.000                              | 0.000    | 0.000                           | 0.000    |
| (B) N-H of product <b>2a</b> hydrogen bonding with sulfonyl oxygen of the TsDPEN ligand (Fig. 4)                                 | 0.005                              | 2.989    | 0.005                           | 3.112    |
| (C) N-H of product <b>2a</b> hydrogen bonding only with water (Fig. 4)                                                           | 0.000                              | 0.000    | 0.000                           | 0.000    |
| (D) N-H of product <b>2a</b> hydrogen bonding with sulfonyl oxygen of the TsDPEN ligand; energy difference in kcal/ mol (Fig. 4) | 0.002                              | 1.325    | 0.002                           | 1.343    |

**Table S4.** The free energy at different temperatures; values are given in (au) and in kcal/mol.

| System                                                                                                                           | Free Energy (T=298.15) |              | Free Energy (T=313.15) |              |
|----------------------------------------------------------------------------------------------------------------------------------|------------------------|--------------|------------------------|--------------|
|                                                                                                                                  | au                     | kcal/mol     | au                     | kcal/mol     |
| <b>Pathway (i) with H<sub>2</sub>O</b>                                                                                           |                        |              |                        |              |
| 3a                                                                                                                               | -1971.307134           | -1236995.226 | -1971.3129             | -1236998.826 |
| 1a                                                                                                                               | -671.0869262           | -421107.0462 | -671.08965             | -421108.7525 |
| Reactant complex                                                                                                                 | -2718.867855           | -1706089.579 | -2718.8761             | -1706094.781 |
| TS B                                                                                                                             | -2718.825481           | -1706062.989 | -2718.8335             | -1706068.046 |
| Product complex                                                                                                                  | -2718.855176           | -1706081.623 | -2718.8636             | -1706086.886 |
| 3a product                                                                                                                       | -1970.123603           | -1236252.561 | -1970.1236             | -1236256.14  |
| 2a                                                                                                                               | -672.3023562           | -421869.7285 | -672.30237             | -421871.5819 |
| H <sub>2</sub> O                                                                                                                 | -76.42128197           | -47954.35443 | -76.422448             | -47955.08612 |
| <b>Pathway (ii) with CH<sub>3</sub>OH</b>                                                                                        |                        |              |                        |              |
| 3a                                                                                                                               | -1971.307134           | -1236995.226 | -1971.3129             | -1236998.826 |
| 1a                                                                                                                               | -671.0869262           | -421107.0462 | -671.08965             | -421108.7525 |
| Reactant complex                                                                                                                 | -2758.131003           | -1730727.204 | -2758.1395             | -1730732.541 |
| TS C                                                                                                                             | -2758.084598           | -1730698.085 | -2758.0929             | -1730703.296 |
| Product complex                                                                                                                  | -2758.114434           | -1730716.807 | -2758.123              | -1730722.211 |
| 3a product                                                                                                                       | -1970.123603           | -1236252.561 | -1970.1236             | -1236256.14  |
| 2a                                                                                                                               | -672.3023562           | -421869.7285 | -672.30237             | -421871.5819 |
| CH <sub>3</sub> OH                                                                                                               | -115.6776661           | -72587.73549 | -115.67905             | -72588.60511 |
| <b>Pathway (iii) without solvent</b>                                                                                             |                        |              |                        |              |
| 3a                                                                                                                               | -1971.307134           | -1236995.226 | -1971.3129             | -1236998.826 |
| 1a                                                                                                                               | -671.0869262           | -421107.0462 | -671.08965             | -421108.7525 |
| Reactant complex                                                                                                                 | -2642.44201            | -1658132.361 | -2642.4501             | -1658137.409 |
| TS A                                                                                                                             | -2642.402971           | -1658107.865 | -2642.4106             | -1658112.681 |
| Product complex                                                                                                                  | -2642.423045           | -1658120.461 | -2642.4309             | -1658125.37  |
| 3a product                                                                                                                       | -1970.123603           | -1236252.561 | -1970.1236             | -1236256.14  |
| 2a                                                                                                                               | -672.3023562           | -421869.7285 | -672.30237             | -421871.5819 |
| TS B                                                                                                                             | -2718.825481           | -1706062.989 | -2718.8335             | -1706068.046 |
| TS B 8M                                                                                                                          | -2718.814608           | -1706056.167 | -2718.8224             | -1706061.056 |
| TS C                                                                                                                             | -2758.084598           | -1730698.085 | -2758.0929             | -1730703.296 |
| TS C 8M                                                                                                                          | -2758.07423            | -1730691.579 | -2758.0822             | -1730696.59  |
| (A) N-H of product <b>2a</b> hydrogen bonding only with methanol (Fig. 4)                                                        | -2758.114434           | -1730716.807 | -2758.1230             | -1730722.211 |
| (B) N-H of product <b>2a</b> hydrogen bonding with sulfonyl oxygen of the TsDPEN ligand (Fig. 4)                                 | -2758.10967            | -1730713.818 | -2758.1181             | -1730719.098 |
| (C) N-H of product <b>2a</b> hydrogen bonding only with water (Fig. 4)                                                           | -2718.855176           | -1706081.623 | -2718.8636             | -1706086.886 |
| (D) N-H of product <b>2a</b> hydrogen bonding with sulfonyl oxygen of the TsDPEN ligand; energy difference in kcal/ mol (Fig. 4) | -2718.853064           | -1706080.297 | -2718.8614             | -1706085.543 |

**Table S5.** The relative electronic energy and the relative free energy in (au) and in kcal/mol.

| System                                                                                                                          | Relative Electronic Energy |          | Relative Free Energy |          |
|---------------------------------------------------------------------------------------------------------------------------------|----------------------------|----------|----------------------|----------|
|                                                                                                                                 | au                         | kcal/mol | au                   | kcal/mol |
| <b>Pathway (i) with H<sub>2</sub>O</b>                                                                                          |                            |          |                      |          |
| 3a + 1a                                                                                                                         | 0.000                      | 0.000    | 0.000                | 0.000    |
| Reactant complex                                                                                                                | -0.084                     | -52.961  | -0.053               | -32.952  |
| TS B                                                                                                                            | -0.042                     | -26.528  | -0.01                | -6.362   |
| Product complex                                                                                                                 | -0.074                     | -46.483  | -0.04                | -24.996  |
| 3a product + 2a+ H <sub>2</sub> O                                                                                               | -0.034                     | -21.338  | -0.032               | -20.017  |
| <b>Pathway (ii) with CH<sub>3</sub>OH</b>                                                                                       |                            |          |                      |          |
| 3a + 1a                                                                                                                         | 0.000                      | 0.000    | 0.000                | 0.000    |
| Reactant complex                                                                                                                | -0.093                     | -58.56   | -0.059               | -37.196  |
| TS C                                                                                                                            | -0.045                     | -28.418  | -0.013               | -8.077   |
| Product complex                                                                                                                 | -0.078                     | -48.783  | -0.043               | -26.799  |
| 3a product + 2a+ CH <sub>3</sub> OH                                                                                             | -0.034                     | -21.338  | -0.032               | -20.017  |
| <b>Pathway (iii) without solvent</b>                                                                                            |                            |          |                      |          |
| 3a + 1a                                                                                                                         | 0.000                      | 0.000    | 0.000                | 0.000    |
| Reactant complex                                                                                                                | -0.061                     | -38.189  | -0.048               | -30.088  |
| TS A                                                                                                                            | -0.024                     | -14.943  | -0.009               | -5.5919  |
| Product complex                                                                                                                 | -0.047                     | -29.663  | -0.029               | -18.188  |
| 3a product + 2a                                                                                                                 | -0.034                     | -21.338  | -0.032               | -20.017  |
| <b>TS B</b>                                                                                                                     |                            |          |                      |          |
| TS B                                                                                                                            | 0.000                      | 0.000    | 0.000                | 0.000    |
| TS B 8M                                                                                                                         | 0.006                      | 3.972    | 0.011                | 6.822    |
| <b>TS C</b>                                                                                                                     |                            |          |                      |          |
| TS C                                                                                                                            | 0.000                      | 0.000    | 0.000                | 0.000    |
| TS C 8M                                                                                                                         | 0.006                      | 4.039    | 0.010                | 6.506    |
| <b>(A) N-H of product 2a hydrogen bonding only with methanol (Fig. 4)</b>                                                       |                            |          |                      |          |
| (A) N-H of product 2a hydrogen bonding only with methanol (Fig. 4)                                                              | 0.000                      | 0.000    | 0.000                | 0.000    |
| <b>(B) N-H of product 2a hydrogen bonding with sulfonyl oxygen of the TsDPEN ligand (Fig. 4)</b>                                |                            |          |                      |          |
| (B) N-H of product 2a hydrogen bonding with sulfonyl oxygen of the TsDPEN ligand (Fig. 4)                                       | 0.002                      | 1.481    | 0.005                | 2.989    |
| <b>(C) N-H of product 2a hydrogen bonding only with water (Fig. 4)</b>                                                          |                            |          |                      |          |
| (C) N-H of product 2a hydrogen bonding only with water (Fig. 4)                                                                 | 0.000                      | 0.000    | 0.000                | 0.000    |
| <b>(D) N-H of product 2a hydrogen bonding with sulfonyl oxygen of the TsDPEN ligand;energy difference in kcal/ mol (Fig. 4)</b> |                            |          |                      |          |
| (D) N-H of product 2a hydrogen bonding with sulfonyl oxygen of the TsDPEN ligand;energy difference in kcal/ mol (Fig. 4)        | 0.002                      | 1.196    | 0.002                | 1.325    |

**Table S6.** The electronic energy and free energy in (au) and in kcal/mol.

| System                                                                                                                           | Electronic Energy |              | Free Energy  |              |
|----------------------------------------------------------------------------------------------------------------------------------|-------------------|--------------|--------------|--------------|
|                                                                                                                                  | au                | kcal/mol     | au           | kcal/mol     |
| <b>Pathway (i) with H<sub>2</sub>O</b>                                                                                           |                   |              |              |              |
| 3a                                                                                                                               | -1971.82          | -1237319.116 | -1971.307134 | -1236995.226 |
| 1a                                                                                                                               | -671.288          | -421233.0252 | -671.0869262 | -421107.0462 |
| Reactant complex                                                                                                                 | -2719.62          | -1706560.801 | -2718.867855 | -1706089.579 |
| TS B                                                                                                                             | -2719.58          | -1706534.369 | -2718.825481 | -1706062.989 |
| Product complex                                                                                                                  | -2719.61          | -1706554.324 | -2718.855176 | -1706081.623 |
| 3a product                                                                                                                       | -1970.62          | -1236563.555 | -1970.123603 | -47954.35443 |
| 2a                                                                                                                               | -672.526          | -422009.9239 | -672.3023562 | -72587.73549 |
| H <sub>2</sub> O                                                                                                                 | -76.4234          | -47955.69902 | -76.42128197 | -47954.35443 |
| <b>Pathway (ii) with CH<sub>3</sub>OH</b>                                                                                        |                   |              |              |              |
| 3a                                                                                                                               | -1971.82          | -1237319.116 | -1971.307134 | -1236995.226 |
| 1a                                                                                                                               | -671.288          | -421233.0252 | -671.0869262 | -421107.0462 |
| Reactant complex                                                                                                                 | -2758.91          | -1731214.795 | -2758.131003 | -1730727.204 |
| TS C                                                                                                                             | -2758.86          | -1731184.653 | -2758.084598 | -1730698.085 |
| Product complex                                                                                                                  | -2758.89          | -1731205.019 | -2758.114434 | -1730716.807 |
| 3a product                                                                                                                       | -1970.62          | -1236563.555 | -1970.123603 | -47954.35443 |
| 2a                                                                                                                               | -672.526          | -422009.9239 | -672.3023562 | -72587.73549 |
| CH <sub>3</sub> OH                                                                                                               | -115.704          | -72604.09386 | -115.6776661 | -72587.73549 |
| <b>Pathway (iii) without solvent</b>                                                                                             |                   |              |              |              |
| 3a                                                                                                                               | -1971.82          | -1237319.116 | -1971.307134 | -1236995.226 |
| 1a                                                                                                                               | -671.288          | -421233.0252 | -671.0869262 | -421107.0462 |
| Reactant complex                                                                                                                 | -2643.17          | -1658590.331 | -2642.44201  | -1658132.361 |
| TS A                                                                                                                             | -2643.13          | -1658567.085 | -2642.402971 | -1658107.865 |
| Product complex                                                                                                                  | -2643.16          | -1658581.804 | -2642.423045 | -1658120.461 |
| 3a product                                                                                                                       | -1970.62          | -1236563.555 | -1970.123603 | -47954.35443 |
| 2a                                                                                                                               | -672.526          | -422009.9239 | -672.3023562 | -72587.73549 |
| TS B                                                                                                                             | -2719.58          | -1706534.369 | -2718.825481 | -1706062.989 |
| TS B 8M                                                                                                                          | -2719.57          | -1706530.396 | -2718.814608 | -1706056.167 |
| TS C                                                                                                                             | -2758.86          | -1731184.653 | -2758.084598 | -1730698.085 |
| TS C 8M                                                                                                                          | -2758.85          | -1731180.614 | -2758.07423  | -1730691.579 |
| (A) N-H of product <b>2a</b> hydrogen bonding only with methanol (Fig. 4)                                                        | -2758.91          | -1731214.795 | -2758.114434 | -1730716.807 |
| (B) N-H of product <b>2a</b> hydrogen bonding with sulfonyl oxygen of the TsDPEN ligand (Fig. 4)                                 | -2758.89          | -1731203.538 | -2758.10967  | -1730713.818 |
| (C) N-H of product <b>2a</b> hydrogen bonding only with water (Fig. 4)                                                           | -2719.62          | -1706560.801 | -2718.855176 | -1706081.623 |
| (D) N-H of product <b>2a</b> hydrogen bonding with sulfonyl oxygen of the TsDPEN ligand; energy difference in kcal/ mol (Fig. 4) | -2719.61          | -1706553.128 | -2718.853064 | -1706080.297 |

## The xyz coordinates of all the structures discussed in the manuscript.

### 3a\_real\_system

C 1.464 0.847 2.780  
C 2.784 1.371 3.033  
C 2.660 2.426 4.047  
C 1.318 2.483 4.468  
C 0.568 1.457 3.727  
Rh 2.056 0.259 4.787  
N 1.013 -0.395 6.538  
C 1.836 -1.317 7.406  
C 1.616 -2.766 7.015  
C 0.679 -3.503 7.761  
C 0.400 -4.837 7.459  
C 1.068 -5.463 6.403  
C 2.009 -4.744 5.660  
C 2.281 -3.406 5.956  
C 3.289 -0.771 7.389  
C 3.393 0.377 8.399  
C 3.330 1.720 8.004  
C 3.380 2.748 8.951  
C 3.506 2.449 10.310  
C 3.588 1.112 10.715  
C 3.529 0.088 9.766  
N 3.666 -0.391 6.022  
S 5.075 -1.063 5.440  
O 4.893 -1.489 4.018  
C 6.322 0.275 5.385  
C 6.578 1.041 6.526  
C 7.582 2.008 6.493  
C 8.348 2.225 5.334  
C 8.076 1.439 4.206  
C 7.074 0.464 4.225  
C 9.450 3.252 5.323  
O 5.619 -2.050 6.434  
C 1.090 -0.083 1.668  
C -0.918 1.278 3.779  
C 0.710 3.427 5.458  
C 3.796 3.289 4.496  
C 3.998 1.115 2.196  
H 3.946 -1.584 7.740  
H 3.269 1.942 6.937  
H 3.331 3.790 8.626  
H 3.553 3.251 11.050  
H 3.709 0.867 11.772  
H 3.607 -0.953 10.089  
H 1.459 -1.217 8.438  
H 0.168 -3.024 8.602  
H -0.327 -5.390 8.055  
H 0.861 -6.508 6.164  
H 2.544 -5.226 4.840  
H 3.013 -2.866 5.359  
H 0.139 -0.864 6.287  
H 1.990 -1.231 4.353  
H 0.771 0.439 7.083  
H 6.869 -0.156 3.352  
H 8.660 1.587 3.293  
H 7.775 2.609 7.386  
H 5.993 0.889 7.434  
H 9.160 4.160 5.873  
H 10.360 2.859 5.805  
H 9.721 3.544 4.299  
H 4.100 3.977 3.690  
H 3.528 3.901 5.368  
H 4.679 2.689 4.761

H 3.950 1.694 1.257  
H 4.914 1.408 2.723  
H 4.096 0.051 1.946  
H 0.858 0.489 0.753  
H 1.912 -0.772 1.433  
H 0.209 -0.688 1.917  
H -1.429 2.030 3.154  
H -1.216 0.286 3.413  
H -1.311 1.391 4.801  
H 0.149 4.229 4.948  
H -0.003 2.921 6.127  
H 1.471 3.906 6.089

### 1a

C 0.056 0.005 -0.026  
C 0.045 0.004 1.382  
C 1.270 0.006 2.042  
C 2.533 0.004 1.408  
C 2.538 0.007 -0.016  
C 1.279 0.010 -0.667  
C -1.247 -0.002 2.105  
H 1.310 0.005 3.131  
O 3.517 -0.004 2.382  
O 3.527 0.004 -0.979  
H 1.325 0.013 -1.759  
C -1.236 -0.001 -0.807  
C -2.514 -0.014 0.074  
N -2.397 -0.011 1.528  
C -1.241 -0.000 3.615  
H -2.277 -0.003 3.973  
H -0.720 -0.884 4.014  
H -0.726 0.888 4.014  
H -1.253 0.877 -1.472  
H -1.238 -0.878 -1.475  
H -3.152 0.849 -0.175  
H -3.132 -0.893 -0.172  
C 4.931 0.002 -0.807  
H 5.334 0.000 -1.828  
H 5.295 0.904 -0.290  
H 5.293 -0.899 -0.288  
C 4.921 0.001 2.213  
H 5.323 0.000 3.234  
H 5.290 -0.898 1.694  
H 5.283 0.905 1.697

### Pathway (i) reactant complex

C -1.283 3.341 4.793  
C -2.125 2.377 4.256  
C -1.595 1.112 3.912  
C -0.227 0.870 4.101  
C 0.629 1.846 4.619  
C 0.094 3.112 4.970  
C -2.506 0.092 3.362  
N -3.652 0.394 2.830  
C -4.041 1.809 2.797  
C -3.601 2.581 4.042  
C -2.104 -1.355 3.402  
O 1.952 1.570 4.884  
C 2.735 1.071 3.779  
O 0.777 4.153 5.522  
C 2.187 4.320 5.291  
O -4.383 -1.162 0.693

N -1.617 -0.958 -0.279  
C -1.340 -0.259 -1.562  
C -2.024 1.093 -1.653  
C -2.950 1.351 -2.673  
C -3.595 2.588 -2.761  
C -3.325 3.587 -1.823  
C -2.402 3.341 -0.800  
C -1.757 2.106 -0.717  
C 0.202 -0.177 -1.725  
C 0.557 0.175 -3.163  
C 0.469 -0.790 -4.176  
C 0.760 -0.463 -5.502  
C 1.147 0.838 -5.836  
C 1.240 1.807 -4.835  
C 0.945 1.475 -3.509  
N 0.809 -1.464 -1.278  
Rh -0.578 -2.806 -0.333  
C -0.958 -4.476 -1.940  
C -2.136 -4.279 -1.179  
C -1.832 -4.509 0.232  
C -0.437 -4.882 0.318  
C 0.121 -4.790 -1.005  
S 2.151 -1.193 -0.296  
O 1.913 -0.145 0.767  
C 3.389 -0.463 -1.420  
C 3.811 -1.187 -2.538  
C 4.774 -0.640 -3.382  
C 5.330 0.625 -3.129  
C 4.897 1.325 -1.995  
C 3.930 0.790 -1.140  
C 6.346 1.220 -4.070  
O 2.691 -2.515 0.137  
C 0.292 -5.355 1.538  
C -2.855 -4.592 1.323  
C -3.498 -3.941 -1.700  
C -0.822 -4.458 -3.429  
C 1.519 -5.144 -1.398  
H 0.537 0.654 -1.078  
H 0.197 -1.811 -3.907  
H 0.690 -1.229 -6.278  
H 1.379 1.093 -6.872  
H 1.548 2.824 -5.084  
H 1.025 2.236 -2.728  
H -1.736 -0.910 -2.356  
H -3.161 0.574 -3.412  
H -4.308 2.772 -3.567  
H -3.825 4.555 -1.890  
H -2.179 4.119 -0.066  
H -1.030 1.936 0.081  
H -1.218 -0.415 0.493  
H 0.000 -2.313 1.040  
H -2.637 -1.040 -0.097  
H 3.381 -2.169 -2.742  
H 5.104 -1.206 -4.258  
H 5.325 2.307 -1.774  
H 3.591 1.330 -0.255  
H 5.855 1.645 -4.961  
H 6.914 2.028 -3.588  
H 7.060 0.463 -4.424  
H 3.683 0.732 4.210  
H 2.252 0.240 3.248  
H 2.925 1.879 3.051  
H 2.782 3.605 5.873  
H 2.429 4.213 4.221

H 2.404 5.346 5.612  
H 0.195 -0.102 3.850  
H -1.665 4.326 5.071  
H -4.161 2.205 4.918  
H -3.845 3.649 3.940  
H -3.603 2.268 1.890  
H -5.135 1.853 2.680  
H -1.818 -1.649 4.423  
H -2.936 -1.983 3.066  
H -1.237 -1.563 2.751  
H -4.243 -0.628 1.543  
H -5.169 -0.774 0.276  
H -0.888 -5.480 -3.844  
H -1.610 -3.861 -3.909  
H 0.149 -4.051 -3.741  
H 1.585 -6.212 -1.672  
H 1.849 -4.556 -2.265  
H 2.226 -4.942 -0.585  
H -4.117 -4.850 -1.785  
H -4.025 -3.251 -1.024  
H -3.452 -3.481 -2.697  
H -3.380 -5.564 1.299  
H -2.390 -4.495 2.314  
H -3.613 -3.801 1.228  
H 0.296 -6.457 1.582  
H 1.333 -5.009 1.534  
H -0.179 -4.985 2.458

#### TS B

C 0.739 -5.926 2.791  
C 0.267 -4.851 3.551  
C 0.344 -3.549 3.027  
C 0.925 -3.352 1.770  
C 1.425 -4.417 1.026  
C 1.306 -5.731 1.529  
C -0.271 -2.394 3.789  
N -0.499 -2.569 5.174  
C 0.068 -3.781 5.761  
C -0.287 -5.022 4.940  
C -1.530 -1.887 3.067  
O 2.030 -4.170 -0.196  
C 3.471 -4.161 -0.112  
O 1.814 -6.829 0.863  
C 1.231 -7.085 -0.427  
N 0.629 -0.348 5.887  
C 1.766 -0.256 6.838  
C 1.388 -0.619 8.264  
C 1.293 0.399 9.224  
C 0.917 0.121 10.540  
C 0.629 -1.191 10.919  
C 0.725 -2.218 9.975  
C 1.101 -1.933 8.661  
C 2.929 -1.060 6.220  
C 4.202 -0.873 7.037  
C 4.950 0.309 6.950  
C 6.087 0.496 7.738  
C 6.495 -0.501 8.630  
C 5.761 -1.686 8.721  
C 4.624 -1.868 7.928  
N 3.042 -0.596 4.811  
Rh 1.268 0.338 4.061  
C 1.791 2.449 3.920  
C 0.353 2.320 4.060  
C -0.150 1.621 2.911  
C 0.982 1.315 2.043  
C 2.161 1.839 2.650

S 3.782 -1.730 3.807  
O 3.470 -3.138 4.221  
C 5.584 -1.547 4.044  
C 6.258 -0.465 3.476  
C 7.636 -0.347 3.650  
C 8.360 -1.300 4.386  
C 7.661 -2.389 4.927  
C 6.281 -2.520 4.761  
C 9.843 -1.144 4.605  
O 3.510 -1.309 2.393  
O -2.325 -0.688 6.145  
C 0.920 0.669 0.696  
C -1.598 1.485 2.564  
C -0.481 2.885 5.166  
C 2.703 3.211 4.824  
C 3.521 1.864 2.034  
H 2.659 -2.132 6.253  
H 4.647 1.072 6.230  
H 6.662 1.421 7.653  
H 7.386 -0.357 9.246  
H 6.076 -2.474 9.408  
H 4.057 -2.800 7.997  
H 2.091 0.799 6.858  
H 1.528 1.428 8.934  
H 0.853 0.930 11.271  
H 0.336 -1.415 11.947  
H 0.508 -3.248 10.265  
H 1.179 -2.746 7.938  
H 0.137 -1.465 5.693  
H 0.516 -1.455 3.659  
H -0.178 0.167 6.262  
H 5.708 0.269 2.889  
H 8.164 0.496 3.198  
H 8.206 -3.152 5.488  
H 5.741 -3.374 5.170  
H 10.045 -0.563 5.520  
H 10.337 -2.119 4.722  
H 10.321 -0.614 3.770  
H 3.834 -3.952 -1.127  
H 3.812 -3.373 0.576  
H 3.853 -5.139 0.222  
H 0.154 -7.302 -0.326  
H 1.374 -6.237 -1.111  
H 1.744 -7.973 -0.817  
H 1.062 -2.345 1.372  
H 0.688 -6.946 3.179  
H -1.386 -5.140 4.917  
H 0.127 -5.927 5.410  
H 1.177 -3.735 5.826  
H -0.326 -3.873 6.785  
H -2.253 -2.715 3.000  
H -1.996 -1.068 3.626  
H -1.296 -1.557 2.045  
H -1.842 -1.519 5.845  
H -3.035 -0.999 6.729  
H -1.968 2.438 2.148  
H -1.773 0.707 1.812  
H -2.212 1.247 3.444  
H 0.888 1.435 -0.098  
H 1.802 0.038 0.522  
H 0.026 0.043 0.584  
H 3.578 2.668 1.279  
H 4.296 2.062 2.784  
H 3.752 0.908 1.546  
H 2.772 4.266 4.508  
H 2.346 3.203 5.863  
H 3.718 2.794 4.812

H -0.847 3.889 4.893  
H -1.358 2.257 5.374  
H 0.092 2.989 6.098

#### Pathway (i) product complex

C -1.410 3.311 4.308  
C -2.205 2.279 3.787  
C -1.603 1.045 3.485  
C -0.226 0.884 3.694  
C 0.566 1.916 4.192  
C -0.040 3.149 4.524  
C -2.422 -0.108 2.929  
N -3.660 0.354 2.252  
C -4.446 1.256 3.115  
C -3.677 2.525 3.512  
C -2.754 -1.141 4.018  
O 1.921 1.719 4.380  
C 2.724 2.115 3.245  
O 0.682 4.233 4.975  
C 1.369 4.041 6.226  
O -4.386 -1.821 0.682  
N -1.533 -1.256 -0.686  
C -1.218 -0.216 -1.657  
C -2.087 1.023 -1.496  
C -3.071 1.312 -2.451  
C -3.888 2.441 -2.331  
C -3.724 3.309 -1.249  
C -2.745 3.034 -0.288  
C -1.940 1.897 -0.405  
C 0.295 0.081 -1.545  
C 0.778 0.822 -2.782  
C 0.942 0.157 -4.006  
C 1.334 0.854 -5.150  
C 1.566 2.232 -5.089  
C 1.407 2.904 -3.876  
C 1.018 2.202 -2.731  
N 0.970 -1.224 -1.307  
Rh -0.294 -2.749 -0.614  
C -0.411 -4.713 -1.504  
C -1.556 -4.503 -0.630  
C -1.045 -4.303 0.694  
C 0.414 -4.467 0.654  
C 0.788 -4.749 -0.689  
S 2.500 -1.037 -0.628  
O 2.566 0.193 0.229  
C 3.655 -0.744 -2.009  
C 3.967 -1.794 -2.875  
C 4.856 -1.572 -3.926  
C 5.441 -0.311 -4.130  
C 5.122 0.719 -3.234  
C 4.234 0.512 -2.176  
C 6.367 -0.066 -5.293  
O 2.909 -2.347 -0.036  
C 1.329 -4.426 1.833  
C -1.866 -4.108 1.925  
C -2.997 -4.534 -1.031  
C -0.476 -5.000 -2.968  
C 2.155 -5.104 -1.176  
H 0.455 0.731 -0.669  
H 0.785 -0.923 -4.046  
H 1.465 0.319 -6.094  
H 1.874 2.777 -5.984  
H 1.589 3.980 -3.817  
H 0.902 2.729 -1.781  
H -1.396 -0.590 -2.688  
H -3.188 0.645 -3.310

H -4.645 2.648 -3.090  
H -4.348 4.201 -1.159  
H -2.594 3.717 0.551  
H -1.176 1.698 0.349  
H -3.367 0.888 1.423  
H -1.828 -0.611 2.147  
H -2.541 -1.402 -0.544  
H 3.527 -2.779 -2.717  
H 5.106 -2.395 -4.601  
H 5.575 1.705 -3.366  
H 3.989 1.312 -1.478  
H 5.815 0.344 -6.154  
H 7.153 0.657 -5.035  
H 6.851 -0.995 -5.627  
H 3.766 1.935 3.536  
H 2.486 1.508 2.358  
H 2.583 3.186 3.022  
H 0.646 3.841 7.035  
H 2.094 3.216 6.166  
H 1.890 4.984 6.431  
H 0.266 -0.056 3.433  
H -1.851 4.280 4.557  
H -4.153 2.989 4.393  
H -3.764 3.268 2.699  
H -5.373 1.522 2.586  
H -4.746 0.690 4.009  
H -3.286 -0.683 4.864  
H -3.373 -1.950 3.605  
H -1.827 -1.574 4.419  
H -4.257 -1.049 1.321  
H -5.289 -1.711 0.344  
H 2.331 -6.185 -1.044  
H 2.271 -4.885 -2.246  
H 2.929 -4.551 -0.632  
H 1.551 -5.449 2.182  
H 2.273 -3.930 1.575  
H 0.878 -3.881 2.674  
H -2.107 -5.085 2.379  
H -1.326 -3.520 2.679  
H -2.811 -3.595 1.699  
H -0.551 -6.087 -3.143  
H -1.351 -4.527 -3.434  
H 0.421 -4.641 -3.490  
H -3.398 -5.558 -0.941  
H -3.603 -3.870 -0.398  
H -3.130 -4.219 -2.075

#### TS B 8M

C -0.180 -4.990 1.907  
C -0.254 -4.153 3.020  
C -0.004 -2.785 2.899  
C 0.342 -2.259 1.654  
C 0.446 -3.083 0.521  
C 0.169 -4.450 0.668  
S -0.714 -4.850 4.643  
O -1.597 -3.829 5.293  
C 0.861 -2.516 -0.811  
N 0.700 -4.926 5.548  
Rh 0.545 -4.436 7.653  
C 0.511 -2.200 7.559  
C 1.879 -2.683 7.647  
C 2.011 -3.382 8.905  
C 0.747 -3.325 9.599  
C -0.174 -2.590 8.751  
C 2.965 -2.385 6.670  
C 3.252 -3.988 9.473

C 0.569 -3.738 11.024  
C -1.552 -2.132 9.105  
C -0.047 -1.303 6.504  
C 1.498 -6.150 5.268  
C 2.339 -6.091 3.999  
C 3.129 -4.973 3.694  
C 3.941 -4.960 2.559  
C 3.976 -6.069 1.707  
C 3.189 -7.185 1.997  
C 2.376 -7.193 3.134  
C 2.392 -6.389 6.513  
C 3.198 -7.674 6.465  
C 4.597 -7.625 6.540  
C 5.360 -8.795 6.518  
C 4.731 -10.038 6.421  
C 3.337 -10.102 6.341  
C 2.579 -8.929 6.361  
N 1.478 -6.312 7.675  
O -1.276 -6.212 4.345  
O 1.436 -6.692 10.297  
H 1.827 -7.391 10.846  
N -0.793 -7.429 9.346  
C -1.607 -6.493 8.736  
C -2.625 -7.042 7.761  
C -2.910 -8.423 7.744  
C -2.092 -9.357 8.599  
C -0.699 -8.763 8.780  
C -3.368 -6.181 6.942  
C -4.395 -6.656 6.130  
C -4.724 -8.030 6.162  
C -3.960 -8.893 6.949  
O -5.078 -5.761 5.329  
C -4.818 -5.928 3.917  
O -5.725 -8.579 5.387  
C -7.044 -8.052 5.624  
C -2.242 -5.520 9.734  
H 0.830 -7.029 5.177  
H 3.084 -4.100 4.346  
H 4.548 -4.080 2.335  
H 4.612 -6.060 0.819  
H 3.204 -8.054 1.335  
H 1.756 -8.065 3.354  
H 3.094 -5.545 6.596  
H 5.095 -6.655 6.614  
H 6.449 -8.735 6.577  
H 5.324 -10.955 6.405  
H 2.836 -11.069 6.262  
H 1.491 -8.999 6.286  
H -0.872 -5.633 8.035  
H 1.849 -6.508 8.659  
H -0.104 -2.136 3.768  
H 0.528 -1.186 1.558  
H 0.227 -5.107 -0.202  
H -0.404 -6.051 2.018  
H 1.956 -2.560 -0.932  
H 0.419 -3.080 -1.644  
H 0.563 -1.463 -0.912  
H -5.337 -5.100 3.418  
H -3.738 -5.869 3.719  
H -5.211 -6.890 3.549  
H -7.357 -8.254 6.662  
H -7.091 -6.970 5.432  
H -7.708 -8.587 4.935  
H -3.113 -5.122 6.865  
H -4.212 -9.956 6.936  
H -2.561 -9.487 9.590  
H -2.032 -10.353 8.132

H -0.193 -8.787 7.789  
H -0.082 -9.367 9.462  
H -3.032 -6.050 10.286  
H -1.490 -5.169 10.446  
H -2.691 -4.666 9.213  
H 0.177 -7.081 9.914  
H 0.735 -7.010 7.552  
H 3.737 -3.271 10.159  
H 3.007 -4.899 10.042  
H 3.986 -4.238 8.694  
H 3.380 -1.377 6.843  
H 3.796 -3.099 6.752  
H 2.586 -2.417 5.640  
H -0.221 -0.295 6.918  
H 0.648 -1.199 5.663  
H -0.997 -1.691 6.115  
H -1.526 -1.058 9.359  
H -2.248 -2.252 8.263  
H -1.958 -2.666 9.971  
H 1.223 -3.125 11.668  
H -0.460 -3.585 11.373  
H 0.853 -4.799 11.161

#### Pathway (ii) reactant complex

C 3.982 -0.680 1.011  
C 3.416 0.555 1.318  
C 3.836 1.274 2.439  
C 4.825 0.739 3.260  
C 5.409 -0.509 2.981  
C 4.976 -1.203 1.843  
S 2.150 1.271 0.217  
O 2.645 2.622 -0.184  
C 6.453 -1.092 3.896  
N 0.798 1.475 1.198  
Rh -0.631 2.776 0.263  
C -0.025 4.716 1.143  
C -1.231 4.363 1.876  
C -2.273 4.214 0.916  
C -1.756 4.530 -0.408  
C -0.357 4.876 -0.251  
C 0.237 0.161 1.626  
C 0.614 -0.202 3.056  
C 0.542 0.753 4.079  
C 0.847 0.412 5.397  
C 1.233 -0.894 5.715  
C 1.314 -1.852 4.702  
C 1.005 -1.507 3.383  
C -1.308 0.200 1.476  
C -1.951 -1.172 1.573  
C -2.846 -1.461 2.611  
C -3.448 -2.719 2.712  
C -3.164 -3.708 1.766  
C -2.273 -3.431 0.724  
C -1.671 -2.174 0.629  
N -1.613 0.895 0.197  
O 1.946 0.242 -0.872  
O -4.364 1.004 -0.846  
C -5.559 0.476 -0.276  
N -3.512 -0.520 -2.965  
C -2.342 -0.203 -3.430  
C -1.347 -1.216 -3.836  
C -1.798 -2.520 -4.121  
C -3.279 -2.774 -4.025  
C -3.855 -1.945 -2.877  
C 0.024 -0.916 -3.918  
C 0.958 -1.892 -4.280

C 0.501 -3.210 -4.556  
 C -0.867 -3.491 -4.487  
 O 2.296 -1.660 -4.414  
 C 2.780 -0.342 -4.104  
 O 1.315 -4.232 -4.967  
 C 2.504 -4.510 -4.203  
 C -1.995 1.256 -3.531  
 C 0.566 5.394 -1.310  
 C -2.586 4.691 -1.644  
 C -3.699 3.858 1.201  
 C -1.358 4.275 3.365  
 C 1.307 4.999 1.755  
 H 0.591 -0.648 0.962  
 H 0.270 1.778 3.821  
 H 0.789 1.170 6.182  
 H 1.476 -1.160 6.745  
 H 1.622 -2.873 4.937  
 H 1.074 -2.260 2.594  
 H -1.714 0.838 2.276  
 H -3.066 -0.693 3.357  
 H -4.137 -2.927 3.532  
 H -3.630 -4.692 1.843  
 H -2.039 -4.199 -0.015  
 H -0.968 -1.980 -0.185  
 H -1.196 0.371 -0.578  
 H -0.043 2.312 -1.120  
 H -2.635 0.944 0.011  
 H 3.387 2.243 2.663  
 H 5.154 1.300 4.139  
 H 5.424 -2.170 1.600  
 H 3.645 -1.216 0.122  
 H 5.985 -1.566 4.775  
 H 7.050 -1.861 3.386  
 H 7.138 -0.319 4.272  
 H 3.864 -0.391 -4.254  
 H 2.354 0.403 -4.797  
 H 2.558 -0.064 -3.061  
 H 3.261 -3.726 -4.324  
 H 2.260 -4.623 -3.134  
 H 2.880 -5.464 -4.591  
 H 0.372 0.086 -3.676  
 H -1.181 -4.511 -4.716  
 H -3.774 -2.480 -4.969  
 H -3.490 -3.843 -3.872  
 H -3.483 -2.330 -1.908  
 H -4.952 -2.024 -2.851  
 H -1.636 1.498 -4.543  
 H -2.878 1.865 -3.305  
 H -1.195 1.543 -2.826  
 H -4.167 0.500 -1.701  
 H -5.804 1.075 0.612  
 H -6.411 0.541 -0.975  
 H -5.444 -0.576 0.041  
 H -4.320 4.769 1.244  
 H -4.115 3.211 0.415  
 H -3.805 3.342 2.165  
 H -1.592 5.261 3.805  
 H -2.158 3.586 3.672  
 H -0.424 3.932 3.831  
 H 1.381 6.061 2.046  
 H 1.467 4.395 2.659  
 H 2.120 4.767 1.056  
 H 0.630 6.495 -1.267  
 H 1.576 4.984 -1.185  
 H 0.217 5.118 -2.314  
 H -3.045 5.695 -1.684  
 H -1.982 4.567 -2.553

H -3.401 3.954 -1.680  
**TS C**  
 C 6.268 -2.536 4.964  
 C 5.603 -1.586 4.189  
 C 6.304 -0.529 3.605  
 C 7.677 -0.415 3.820  
 C 8.368 -1.345 4.614  
 C 7.643 -2.408 5.171  
 S 3.809 -1.761 3.898  
 O 3.589 -1.390 2.462  
 C 9.844 -1.192 4.876  
 N 3.055 -0.579 4.835  
 Rh 1.327 0.366 3.989  
 C 2.276 1.789 2.522  
 C 1.957 2.446 3.782  
 C 0.518 2.392 3.950  
 C -0.040 1.685 2.828  
 C 1.062 1.310 1.948  
 C 2.879 -0.996 6.253  
 C 4.118 -0.803 7.118  
 C 4.890 0.363 7.033  
 C 5.992 0.554 7.869  
 C 6.342 -0.423 8.806  
 C 5.583 -1.593 8.896  
 C 4.482 -1.780 8.056  
 C 1.702 -0.158 6.795  
 C 1.262 -0.470 8.216  
 C 1.192 0.570 9.153  
 C 0.760 0.336 10.461  
 C 0.389 -0.951 10.854  
 C 0.459 -1.999 9.931  
 C 0.893 -1.760 8.625  
 N 0.606 -0.274 5.801  
 O 3.466 -3.148 4.353  
 N -0.475 -2.518 5.091  
 C -0.231 -2.338 3.711  
 C 0.382 -3.494 2.949  
 C 0.307 -4.796 3.473  
 C -0.248 -4.970 4.861  
 C 0.097 -3.727 5.683  
 C 0.969 -3.295 1.695  
 C 1.473 -4.358 0.951  
 C 1.350 -5.673 1.451  
 C 0.780 -5.870 2.712  
 O 2.085 -4.105 -0.266  
 C 3.526 -4.135 -0.182  
 O 1.855 -6.771 0.782  
 C 1.273 -7.020 -0.509  
 C -1.474 -1.805 2.980  
 O -2.384 -0.722 6.075  
 C -3.312 -1.162 7.057  
 C 0.946 0.650 0.613  
 C -1.499 1.601 2.512  
 C -0.265 3.033 5.050  
 C 2.921 3.179 4.654  
 C 3.622 1.735 1.877  
 H 2.590 -2.062 6.309  
 H 4.633 1.110 6.280  
 H 6.586 1.467 7.785  
 H 7.205 -0.276 9.459  
 H 5.852 -2.366 9.619  
 H 3.895 -2.699 8.124  
 H 2.039 0.894 6.795  
 H 1.489 1.579 8.853  
 H 0.716 1.162 11.175

H 0.051 -1.139 11.875  
 H 0.178 -3.010 10.231  
 H 0.950 -2.589 7.920  
 H 0.124 -1.407 5.612  
 H 0.575 -1.408 3.592  
 H -0.216 0.249 6.131  
 H 5.779 0.186 2.973  
 H 8.226 0.408 3.356  
 H 8.163 -3.154 5.778  
 H 5.707 -3.370 5.386  
 H 10.022 -0.569 5.768  
 H 10.324 -2.164 5.055  
 H 10.356 -0.707 4.032  
 H 3.894 -3.906 -1.190  
 H 3.885 -3.375 0.529  
 H 3.884 -5.131 0.124  
 H 0.195 -7.233 -0.411  
 H 1.420 -6.170 -1.191  
 H 1.783 -7.909 -0.902  
 H 1.106 -2.288 1.299  
 H 0.729 -6.891 3.097  
 H -1.346 -5.096 4.835  
 H 0.172 -5.872 5.332  
 H 1.205 -3.674 5.756  
 H -0.307 -3.824 6.703  
 H -2.210 -2.619 2.902  
 H -1.931 -0.981 3.541  
 H -1.224 -1.471 1.964  
 H -1.852 -1.513 5.757  
 H -3.920 -0.297 7.360  
 H -3.998 -1.938 6.669  
 H -2.815 -1.561 7.962  
 H 3.050 4.219 4.306  
 H 2.577 3.222 5.697  
 H 3.910 2.701 4.645  
 H 3.676 2.465 1.052  
 H 4.417 1.987 2.591  
 H 3.830 0.735 1.476  
 H 0.910 1.409 -0.187  
 H 1.807 -0.002 0.417  
 H 0.033 0.046 0.531  
 H -1.844 2.561 2.091  
 H -1.717 0.820 1.774  
 H -2.104 1.396 3.406  
 H -0.555 4.058 4.764  
 H -1.189 2.479 5.268  
 H 0.315 3.105 5.979

**Pathway (ii) product complex**

C 2.910 -0.546 1.217  
 C 2.310 0.676 1.506  
 C 2.972 1.636 2.275  
 C 4.244 1.354 2.768  
 C 4.873 0.126 2.500  
 C 4.187 -0.812 1.717  
 S 0.685 1.091 0.794  
 O 0.884 2.416 0.133  
 C 6.240 -0.177 3.057  
 N -0.395 1.285 2.061  
 Rh -1.758 2.901 2.060  
 C -0.776 4.865 1.508  
 C -1.553 4.946 2.735  
 C -2.940 4.666 2.416  
 C -2.995 4.328 1.015  
 C -1.653 4.481 0.451  
 C -1.001 -0.011 2.492



C -0.038 -0.984 3.152  
C 0.770 -0.586 4.228  
C 1.606 -1.503 4.866  
C 1.643 -2.836 4.442  
C 0.841 -3.242 3.373  
C 0.009 -2.319 2.733  
C -2.155 0.339 3.460  
C -3.131 -0.814 3.629  
C -3.148 -1.577 4.803  
C -4.043 -2.642 4.951  
C -4.937 -2.953 3.924  
C -4.931 -2.194 2.748  
C -4.034 -1.134 2.602  
N -2.800 1.530 2.939  
O 0.308 -0.083 -0.074  
N -1.426 -0.039 -2.564  
C -0.522 0.234 -3.705  
C 0.380 -0.943 -4.071  
C 0.164 -2.231 -3.551  
C -0.945 -2.485 -2.555  
C -2.011 -1.390 -2.613  
C 1.458 -0.736 -4.945  
C 2.312 -1.771 -5.321  
C 2.060 -3.076 -4.843  
C 1.006 -3.278 -3.954  
O 3.353 -1.494 -6.192  
C 4.663 -1.652 -5.616  
O 2.861 -4.154 -5.183  
C 2.804 -4.520 -6.574  
C -1.325 0.727 -4.920  
O -3.443 1.859 -2.274  
C -4.584 1.428 -2.996  
C -1.320 4.362 -0.998  
C -4.214 3.989 0.224  
C -4.100 4.755 3.357  
C -1.034 5.390 4.063  
C 0.666 5.230 1.379  
H -1.446 -0.510 1.614  
H 0.759 0.458 4.546  
H 2.236 -1.177 5.697  
H 2.297 -3.554 4.942  
H 0.864 -4.280 3.034  
H -0.613 -2.635 1.892  
H -1.703 0.543 4.454  
H -2.447 -1.337 5.606  
H -4.042 -3.228 5.873  
H -5.639 -3.781 4.039  
H -5.630 -2.430 1.942  
H -4.034 -0.532 1.690  
H -0.874 0.031 -1.696  
H 0.126 1.062 -3.374  
H -3.686 1.733 3.406  
H 2.496 2.597 2.478  
H 4.768 2.107 3.363  
H 4.661 -1.770 1.489  
H 2.380 -1.274 0.602  
H 6.167 -0.609 4.069  
H 6.777 -0.903 2.431  
H 6.855 0.730 3.134  
H 5.377 -1.413 -6.414  
H 4.804 -0.948 -4.778  
H 4.828 -2.681 -5.262  
H 1.782 -4.831 -6.850  
H 3.122 -3.691 -7.224  
H 3.487 -5.370 -6.692  
H 1.671 0.260 -5.339  
H 0.841 -4.293 -3.582

H -1.396 -3.475 -2.734  
H -0.517 -2.510 -1.537  
H -2.714 -1.490 -1.772  
H -2.603 -1.483 -3.538  
H -2.029 -0.042 -5.268  
H -1.892 1.631 -4.655  
H -0.657 0.965 -5.760  
H -2.710 1.170 -2.383  
H -5.377 2.180 -2.863  
H -4.393 1.334 -4.083  
H -4.977 0.457 -2.636  
H -4.588 4.894 -0.285  
H -3.993 3.236 -0.547  
H -5.021 3.612 0.866  
H -1.403 5.352 -1.480  
H -0.297 3.993 -1.136  
H -2.009 3.680 -1.516  
H 0.762 6.301 1.130  
H 1.211 5.063 2.319  
H 1.155 4.640 0.596  
H -1.050 6.492 4.129  
H -1.644 4.999 4.888  
H 0.001 5.064 4.221  
H -4.515 5.776 3.367  
H -4.912 4.077 3.062  
H -3.808 4.506 4.387

#### TS C 8M

C -0.210 -4.996 1.883  
C -0.235 -4.190 3.025  
C 0.061 -2.816 2.904  
C 0.426 -2.305 1.652  
C 0.483 -3.118 0.522  
C 0.121 -4.480 0.629  
C -0.123 -1.899 4.098  
N -0.233 -2.530 5.330  
C 0.159 -3.923 5.440  
C -0.566 -4.754 4.383  
C -1.269 -0.906 3.862  
O 0.880 -2.563 -0.680  
C 2.181 -3.011 -1.121  
O 0.159 -5.352 -0.439  
C -0.699 -5.008 -1.542  
O 0.085 -1.135 7.405  
C -0.458 -1.702 8.571  
N 2.389 -1.315 6.067  
C 3.837 -1.549 6.283  
C 4.121 -2.635 7.307  
C 4.754 -2.304 8.513  
C 5.009 -3.278 9.482  
C 4.630 -4.603 9.258  
C 3.998 -4.946 8.059  
C 3.749 -3.971 7.092  
C 4.437 -1.818 4.879  
C 5.955 -1.922 4.953  
C 6.755 -0.779 5.092  
C 8.142 -0.887 5.207  
C 8.753 -2.145 5.186  
C 7.965 -3.291 5.043  
C 6.577 -3.177 4.926  
N 3.940 -0.736 3.988  
Rh 2.172 0.265 4.714  
C 3.078 2.190 5.276  
C 1.995 1.874 6.181  
C 0.763 1.845 5.433  
C 1.095 2.133 4.046

C 2.506 2.349 3.950  
S 3.946 -1.164 2.362  
O 3.711 -2.634 2.162  
C 5.634 -0.860 1.739  
C 6.048 0.443 1.457  
C 7.334 0.663 0.967  
C 8.224 -0.402 0.754  
C 7.775 -1.703 1.027  
C 6.489 -1.939 1.516  
C 9.626 -0.154 0.261  
O 3.064 -0.182 1.652  
C 0.141 2.334 2.914  
C -0.586 1.754 6.066  
C 2.085 1.689 7.661  
C 4.499 2.455 5.645  
C 3.222 2.821 2.727  
H 4.051 -2.799 4.541  
H 6.279 0.201 5.077  
H 8.750 0.013 5.308  
H 9.838 -2.231 5.274  
H 8.433 -4.277 5.018  
H 5.967 -4.075 4.807  
H 4.261 -0.606 6.658  
H 5.056 -1.269 8.692  
H 5.506 -3.000 10.413  
H 4.826 -5.366 10.013  
H 3.700 -5.980 7.874  
H 3.265 -4.261 6.156  
H 0.896 -1.096 4.094  
H 1.767 -1.170 6.914  
H 5.356 1.273 1.595  
H 7.654 1.682 0.735  
H 8.443 -2.550 0.851  
H 6.138 -2.952 1.716  
H 10.320 -0.018 1.106  
H 9.999 -0.999 -0.333  
H 9.681 0.752 -0.356  
H 2.412 -2.425 -2.019  
H 2.934 -2.819 -0.342  
H 2.171 -4.085 -1.368  
H -1.754 -5.008 -1.221  
H -0.446 -4.026 -1.966  
H -0.550 -5.793 -2.294  
H 0.747 -1.267 1.543  
H -0.453 -6.060 1.951  
H -1.653 -4.711 4.575  
H -0.264 -5.812 4.442  
H 1.251 -4.087 5.293  
H -0.078 -4.260 6.460  
H -2.185 -1.480 3.653  
H -1.435 -0.303 4.759  
H -1.061 -0.257 3.004  
H -0.190 -1.861 6.343  
H 1.972 -2.141 5.618  
H -1.461 -2.146 8.394  
H 0.177 -2.507 9.003  
H -0.587 -0.940 9.366  
H 1.848 2.637 8.174  
H 1.366 0.928 7.999  
H 3.094 1.391 7.979  
H 4.659 3.534 5.821  
H 4.789 1.929 6.565  
H 5.184 2.143 4.846  
H 2.932 3.860 2.496  
H 4.310 2.807 2.872  
H 2.987 2.191 1.859  
H 0.052 3.411 2.690

H 0.493 1.838 2.000  
H -0.862 1.961 3.150  
H -0.743 2.619 6.733  
H -1.391 1.768 5.321  
H -0.668 0.835 6.676

**Pathway (iii) reactant complex**

C 4.908 -0.650 2.485  
C 4.002 -1.253 1.609  
C 3.864 -2.639 1.572  
C 4.634 -3.426 2.432  
C 5.541 -2.848 3.330  
C 5.669 -1.448 3.336  
S 3.059 -0.217 0.438  
O 4.065 0.702 -0.174  
C 6.344 -3.699 4.280  
N 2.016 0.720 1.379  
Rh 1.414 2.535 0.395  
C 0.949 4.688 0.754  
C 1.546 4.503 -0.554  
C 2.885 3.992 -0.344  
C 3.084 3.877 1.084  
C 1.911 4.352 1.771  
C 0.871 -0.075 1.897  
C 1.158 -0.750 3.233  
C 1.795 -0.047 4.265  
C 2.000 -0.640 5.511  
C 1.574 -1.952 5.744  
C 0.945 -2.664 4.720  
C 0.740 -2.065 3.474  
C -0.328 0.887 2.064  
C -1.612 0.205 2.499  
C -2.166 0.491 3.755  
C -3.348 -0.124 4.175  
C -3.996 -1.036 3.340  
C -3.454 -1.328 2.084  
C -2.272 -0.714 1.667  
N -0.468 1.652 0.793  
O 2.334 -1.191 -0.454  
N -1.366 0.192 -1.715  
C -0.241 -0.363 -2.482  
C -0.638 -1.544 -3.363  
C -1.826 -1.176 -4.211  
C -2.774 -0.292 -3.648  
C -2.528 0.227 -2.282  
C -3.907 0.066 -4.397  
C -4.115 -0.435 -5.681  
C -3.194 -1.363 -6.218  
C -2.054 -1.703 -5.481  
O -5.248 -0.041 -6.370  
C -4.981 0.755 -7.541  
O -3.340 -1.908 -7.475  
C -4.519 -2.717 -7.664  
C -3.677 0.846 -1.526  
C 3.934 3.770 -1.388  
C 0.955 4.935 -1.861  
C -0.417 5.245 1.003  
C 1.753 4.526 3.249  
C 4.350 3.423 1.735  
H 0.567 -0.853 1.171  
H 2.156 0.964 4.066  
H 2.503 -0.081 6.304  
H 1.737 -2.419 6.718  
H 0.617 -3.692 4.889  
H 0.248 -2.625 2.675  
H -0.048 1.623 2.834

H -1.654 1.195 4.416  
H -3.761 0.107 5.159  
H -4.919 -1.520 3.666  
H -3.955 -2.042 1.426  
H -1.862 -0.944 0.680  
H -0.771 1.053 -0.008  
H 1.342 1.706 -0.939  
H -1.193 2.367 0.908  
H 5.021 0.434 2.487  
H 6.382 -0.977 4.018  
H 4.529 -4.514 2.401  
H 3.167 -3.086 0.863  
H 5.891 -3.701 5.285  
H 6.397 -4.742 3.940  
H 7.372 -3.322 4.389  
H -5.958 0.982 -7.982  
H -4.479 1.696 -7.260  
H -4.359 0.212 -8.269  
H -4.490 -3.593 -6.996  
H -5.440 -2.145 -7.480  
H -4.487 -3.054 -8.706  
H -4.647 0.767 -4.008  
H -1.348 -2.408 -5.926  
H -0.897 -2.407 -2.721  
H 0.211 -1.858 -3.985  
H 0.168 0.456 -3.103  
H 0.556 -0.644 -1.781  
H -4.548 0.174 -1.498  
H -3.371 1.073 -0.499  
H -4.006 1.780 -2.009  
H 2.131 5.507 3.588  
H 0.699 4.465 3.559  
H 2.306 3.758 3.808  
H 5.037 4.276 1.874  
H 4.158 2.987 2.726  
H 4.853 2.666 1.121  
H 4.639 4.619 -1.424  
H 4.500 2.852 -1.185  
H 3.487 3.665 -2.386  
H -0.377 6.343 1.098  
H -1.106 5.018 0.176  
H -0.856 4.858 1.934  
H 1.189 5.994 -2.069  
H 1.349 4.338 -2.694  
H -0.138 4.830 -1.870

**TS A**

C 6.705 -1.092 4.748  
C 5.926 -2.151 5.219  
C 6.476 -3.116 6.062  
C 7.811 -3.001 6.454  
C 8.610 -1.935 6.015  
C 8.037 -0.991 5.147  
S 4.181 -2.290 4.694  
O 4.159 -1.900 3.250  
C 10.038 -1.795 6.477  
N 3.338 -1.119 5.562  
Rh 1.844 0.022 4.541  
C 1.506 2.223 4.740  
C 0.773 1.714 3.595  
C 1.752 1.230 2.639  
C 3.055 1.409 3.194  
C 2.904 2.026 4.503  
C 2.912 -1.577 6.912  
C 4.020 -1.559 7.953  
C 4.891 -0.467 8.072

C 5.870 -0.438 9.066  
C 5.994 -1.505 9.963  
C 5.134 -2.600 9.851  
C 4.157 -2.625 8.852  
C 1.736 -0.651 7.324  
C 1.091 -1.025 8.652  
C 1.542 -0.426 9.839  
C 0.974 -0.751 11.073  
C -0.069 -1.679 11.142  
C -0.536 -2.273 9.967  
C 0.038 -1.949 8.735  
N 0.790 -0.639 6.196  
O 3.777 -3.693 5.067  
N -0.088 -2.910 5.112  
C 0.592 -4.128 5.574  
C 0.285 -5.282 4.627  
C 0.714 -4.895 3.235  
C 0.604 -3.538 2.858  
C 0.033 -2.562 3.813  
C 1.043 -3.145 1.585  
C 1.590 -4.059 0.692  
C 1.621 -5.431 1.037  
C 1.197 -5.821 2.312  
O 2.097 -3.595 -0.508  
C 3.542 -3.620 -0.550  
O 2.135 -6.402 0.210  
C 1.546 -6.494 -1.102  
C -1.023 -1.609 3.302  
C 1.483 0.772 1.241  
C -0.683 1.940 3.336  
C 0.896 2.914 5.920  
C 4.033 2.444 5.388  
C 4.345 1.179 2.472  
H 2.513 -2.606 6.875  
H 4.811 0.350 7.354  
H 6.545 0.417 9.140  
H 6.761 -1.485 10.739  
H 5.225 -3.441 10.543  
H 3.487 -3.484 8.766  
H 2.177 0.357 7.458  
H 2.359 0.297 9.793  
H 1.345 -0.275 11.982  
H -0.519 -1.932 12.104  
H -1.357 -2.993 10.008  
H -0.352 -2.408 7.826  
H 0.101 -1.999 5.747  
H 1.252 -1.389 3.854  
H 0.047 0.029 6.431  
H 6.274 -0.368 4.056  
H 8.649 -0.166 4.771  
H 8.239 -3.757 7.117  
H 5.858 -3.949 6.397  
H 10.094 -1.210 7.410  
H 10.493 -2.775 6.680  
H 10.655 -1.278 5.729  
H 3.825 -3.164 -1.507  
H 3.961 -3.036 0.284  
H 3.926 -4.651 -0.503  
H 0.472 -6.730 -1.021  
H 1.674 -5.564 -1.674  
H 2.063 -7.321 -1.601  
H 1.046 -2.094 1.297  
H 1.268 -6.880 2.571  
H -0.795 -5.513 4.646  
H 0.819 -6.186 4.954  
H 1.686 -3.983 5.606  
H 0.233 -4.344 6.591

H -1.932 -2.193 3.081  
H -1.266 -0.859 4.064  
H -0.710 -1.101 2.384  
H 1.585 1.617 0.537  
H 2.195 -0.002 0.929  
H 0.466 0.375 1.121  
H -0.858 2.965 2.965  
H -1.078 1.250 2.579  
H -1.289 1.818 4.245  
H 0.810 3.998 5.733  
H -0.116 2.544 6.133  
H 1.499 2.785 6.829  
H 4.502 3.372 5.017  
H 3.695 2.633 6.416  
H 4.812 1.669 5.428  
H 4.417 1.840 1.591  
H 5.204 1.404 3.118  
H 4.442 0.137 2.139

### Pathway (iii) product complex

C 2.633 -1.073 -0.371  
C 2.223 -0.665 0.901  
C 3.147 -0.512 1.932  
C 4.498 -0.773 1.681  
C 4.938 -1.192 0.417  
C 3.983 -1.333 -0.603  
S 0.437 -0.393 1.174  
O -0.005 0.461 0.017  
C 6.389 -1.513 0.164  
N 0.269 0.450 2.591  
Rh 0.431 2.496 2.828  
C 1.214 4.486 3.146  
C 0.004 4.559 2.376  
C 0.236 3.842 1.122  
C 1.608 3.393 1.105  
C 2.200 3.741 2.360  
C -0.271 -0.303 3.761  
C 0.828 -0.906 4.625  
C 1.609 -0.134 5.503  
C 2.619 -0.726 6.265  
C 2.867 -2.099 6.165  
C 2.096 -2.876 5.297  
C 1.085 -2.282 4.535  
C -1.191 0.675 4.530  
C -2.658 0.594 4.124  
C -3.617 0.183 5.060  
C -4.969 0.097 4.713  
C -5.378 0.419 3.417  
C -4.428 0.828 2.474  
C -3.081 0.925 2.825  
N -0.644 2.022 4.367  
O -0.189 -1.749 1.293  
N -1.674 -1.328 -2.187  
C -0.924 -2.555 -2.423  
C -1.454 -3.202 -3.699  
C -1.452 -2.209 -4.839  
C -1.413 -0.824 -4.585  
C -1.378 -0.276 -3.162  
C -1.343 0.057 -5.674  
C -1.338 -0.393 -6.993  
C -1.436 -1.777 -7.247  
C -1.472 -2.658 -6.168  
O -1.281 0.540 -8.018  
C -0.059 0.503 -8.774  
O -1.426 -2.294 -8.533  
C -2.586 -1.958 -9.316

C -2.367 0.874 -2.939  
C -0.732 3.713 -0.004  
C -1.244 5.297 2.736  
C 1.471 5.124 4.474  
C 3.612 3.483 2.774  
C 2.298 2.760 -0.059  
H -0.884 -1.135 3.388  
H 1.417 0.938 5.585  
H 3.212 -0.114 6.949  
H 3.654 -2.561 6.764  
H 2.279 -3.949 5.212  
H 0.492 -2.887 3.845  
H -1.141 0.391 5.599  
H -3.298 -0.079 6.072  
H -5.703 -0.223 5.456  
H -6.432 0.348 3.139  
H -4.740 1.069 1.455  
H -2.341 1.242 2.087  
H -1.466 -0.966 -1.253  
H -0.348 0.128 -3.004  
H -1.188 2.720 4.880  
H 1.902 -1.180 -1.175  
H 4.302 -1.652 -1.599  
H 5.223 -0.655 2.491  
H 2.813 -0.192 2.920  
H 7.046 -0.998 0.879  
H 6.574 -2.594 0.267  
H 6.694 -1.227 -0.851  
H -0.157 1.270 -9.552  
H 0.802 0.747 -8.130  
H 0.100 -0.480 -9.240  
H -3.500 -2.361 -8.847  
H -2.690 -0.869 -9.442  
H -2.441 -2.434 -10.294  
H -1.272 1.136 -5.517  
H -1.515 -3.729 -6.386  
H -2.481 -3.559 -3.514  
H -0.847 -4.081 -3.971  
H 0.172 -2.379 -2.534  
H -1.059 -3.220 -1.558  
H -3.392 0.537 -3.146  
H -2.315 1.204 -1.891  
H -2.141 1.741 -3.577  
H 2.629 3.542 -0.763  
H 3.184 2.191 0.248  
H 1.629 2.075 -0.595  
H 4.251 4.345 2.514  
H 3.693 3.327 3.858  
H 4.022 2.599 2.272  
H 1.939 6.114 4.343  
H 0.543 5.270 5.042  
H 2.148 4.516 5.089  
H -1.246 6.298 2.273  
H -2.140 4.768 2.387  
H -1.337 5.437 3.821  
H -0.543 4.496 -0.759  
H -0.633 2.733 -0.489  
H -1.769 3.825 0.339

### 2a

C -3.186 2.695 1.167  
C -2.835 2.151 -0.078  
C -1.797 2.750 -0.809  
C -1.108 3.842 -0.250  
C -1.445 4.362 1.001  
C -2.526 3.790 1.715

C -3.562 0.934 -0.604  
C -2.740 0.241 -1.687  
N -2.353 1.248 -2.673  
C -1.359 2.200 -2.164  
C -1.157 3.290 -3.222  
O -0.783 5.396 1.617  
C 0.359 5.934 0.957  
O -2.887 4.209 2.978  
C -3.368 5.559 3.075  
H -1.985 0.805 -3.517  
H -0.376 1.696 -1.997  
H -0.277 4.281 -0.801  
H -3.993 2.250 1.754  
H -3.771 0.237 0.223  
H -4.535 1.231 -1.032  
H -1.864 -0.264 -1.222  
H -3.341 -0.531 -2.189  
H -0.888 2.832 -4.188  
H -2.084 3.863 -3.359  
H -0.347 3.981 -2.953  
H 1.135 5.166 0.801  
H 0.095 6.386 -0.013  
H 0.748 6.713 1.624  
H -3.674 5.694 4.120  
H -2.587 6.290 2.822  
H -4.243 5.709 2.419

### 3a\_product

C 6.298 -3.533 2.622  
C 7.339 -2.684 3.013  
C 7.856 -1.740 2.128  
C 7.322 -1.648 0.839  
C 6.283 -2.489 0.417  
C 5.779 -3.430 1.333  
S 8.016 -2.890 4.699  
O 8.914 -4.088 4.654  
C 5.734 -2.409 -0.983  
N 8.902 -1.524 5.044  
C 10.387 -1.668 5.057  
C 11.012 -1.305 3.715  
C 11.173 0.026 3.293  
C 11.725 0.314 2.042  
C 12.126 -0.721 1.191  
C 11.973 -2.047 1.602  
C 11.423 -2.334 2.855  
C 10.908 -0.803 6.231  
C 11.081 -1.570 7.537  
C 12.362 -1.729 8.087  
C 12.550 -2.427 9.284  
C 11.452 -2.982 9.946  
C 10.170 -2.832 9.405  
C 9.983 -2.126 8.215  
N 10.008 0.340 6.373  
Rh 8.162 0.248 5.787  
C 7.304 2.229 5.932  
C 7.022 1.490 7.130  
C 6.209 0.332 6.754  
C 5.942 0.410 5.336  
C 6.649 1.540 4.817  
O 6.814 -2.946 5.593  
C 7.416 1.857 8.525  
C 8.055 3.517 5.826  
C 6.647 2.009 3.399  
C 5.016 -0.483 4.578  
C 5.642 -0.683 7.686  
H 10.635 -2.719 5.259

|   |        |        |        |
|---|--------|--------|--------|
| H | 10.859 | 0.836  | 3.955  |
| H | 11.850 | 1.354  | 1.731  |
| H | 12.559 | -0.493 | 0.214  |
| H | 12.285 | -2.863 | 0.947  |
| H | 11.290 | -3.372 | 3.170  |
| H | 11.913 | -0.440 | 5.941  |
| H | 13.224 | -1.302 | 7.565  |
| H | 13.554 | -2.540 | 9.697  |
| H | 11.594 | -3.532 | 10.878 |
| H | 9.309  | -3.273 | 9.912  |
| H | 8.982  | -2.014 | 7.792  |
| H | 10.301 | 0.967  | 7.126  |
| H | 5.894  | -4.260 | 3.329  |
| H | 4.965  | -4.094 | 1.029  |
| H | 7.730  | -0.908 | 0.145  |
| H | 8.666  | -1.082 | 2.446  |
| H | 6.015  | -1.466 | -1.472 |
| H | 6.120  | -3.232 | -1.606 |
| H | 4.636  | -2.486 | -0.992 |
| H | 7.592  | 2.500  | 3.133  |
| H | 6.488  | 1.176  | 2.701  |
| H | 5.836  | 2.741  | 3.238  |
| H | 5.244  | -0.493 | 3.505  |
| H | 5.073  | -1.516 | 4.943  |
| H | 3.978  | -0.127 | 4.697  |
| H | 5.660  | -1.680 | 7.228  |
| H | 6.205  | -0.726 | 8.627  |
| H | 4.595  | -0.431 | 7.934  |
| H | 8.300  | 2.509  | 8.540  |
| H | 6.597  | 2.398  | 9.029  |
| H | 7.646  | 0.967  | 9.126  |
| H | 8.633  | 3.571  | 4.894  |
| H | 7.359  | 4.373  | 5.836  |
| H | 8.755  | 3.652  | 6.661  |

## References

1. Ahlrichs, R.; Bar, M.; Haser, M.; Horn, H.; Kolmel, C. *Chem. Phys. Lett.* 1989, **162**, 165-169.
2. Schafer, A.; Huber, C.; Ahlrichs, R. *J. Chem. Phys.* 1994, **100**, 5829-5835.
3. a) Perdew, J. P.; Burke, K.; Ernzerhof, M. *Phys. Rev. Lett.* 1996, **77**, 3865-3868; b) Perdew, J. P.; Wang, Y. *Phys. Rev. B* 1992, **45**, 13244-13249.
4. Bauernschmitt, R.; Ahlrichs, R. *Chem. Phys. Lett.* 1996, **256**, 454-464.
5. a) Grimme, S. *J. Comput. Chem.* 2004, **25**, 1463-1473; b) Grimme, S. *J. Comput. Chem.* 2006, **27**, 1787-1799.
6. Grimme, S.; Antony, J.; Ehrlich, S.; Krieg, H. *J. Chem. Phys.* 2010, **132**, 154104-154119
7. Eichkorn, K.; Treutler, O.; Ohm, H.; Haser, M.; Ahlrichs, R. *Chem. Phys. Lett.* **1995**, **240**, 283-289.
8. Sierka, M.; Hogekamp, A.; Ahlrichs, R. *J. Chem. Phys.* 2003, **118**, 9136-9148.
9. Fukui, K. *Accounts Chem. Res.* 1981, **14**, 363-368.
10. J. W. Handgraaf, E. J. Meijer, *J. Am. Chem. Soc.* 2007, **129**, 3099-3103.
11. P. A. Dub, T. Ikariya, *J. Am. Chem. Soc.* 2013, **135**, 2604-2619.
